# 1 **Mass-spectrometry based proteomics reveals mitochondrial supercomplexome** 2 **plasticity**

3  
4 Alba Gonzalez-Franquesa<sup>1</sup>, Ben Stocks<sup>1</sup>, Sabina Chubanava<sup>1</sup>, Helle Baltzer Hattel<sup>2</sup>, Roger  
5 Moreno-Justicia<sup>1</sup>, Jonas T. Treebak<sup>1</sup>, Juleen R. Zierath<sup>1,3</sup>, Atul S. Deshmukh<sup>1,2,4\*</sup>

6 *<sup>1</sup>Novo Nordisk Foundation Center for Basic Metabolic Research, University of Copenhagen,*  
7 *Copenhagen 2200, Denmark. <sup>2</sup>Novo Nordisk Foundation Center for Protein Research,*  
8 *University of Copenhagen, Copenhagen 2200, Denmark. <sup>3</sup>Integrative Physiology,*  
9 *Department of Molecular Medicine and Surgery, Karolinska Institutet, Stockholm 171 77,*  
10 *Sweden. <sup>4</sup>Lead Contact \*Correspondence: [atul.deshmukh@sund.ku.dk](mailto:atul.deshmukh@sund.ku.dk)*

11

## 12 **Summary:**

13 Mitochondrial respiratory complex subunits assemble in supercomplexes. Studies of  
14 supercomplexes have typically relied upon antibody-based protein quantification, often  
15 limited to the analysis of a single subunit per respiratory complex. To provide a deeper  
16 insight into mitochondrial and supercomplex plasticity, we combined Blue Native  
17 Polyacrylamide Gel Electrophoresis (BN-PAGE) and mass spectrometry to determine the  
18 supercomplexome of skeletal muscle from sedentary and exercise-trained mice. We  
19 quantified 422 mitochondrial proteins within ten supercomplex bands, in which we showed  
20 the debated presence of complex II and V. Upon exercise-induced mitochondrial biogenesis,  
21 non-stoichiometric changes in subunits and incorporation into supercomplexes was  
22 apparent. We uncovered the dynamics of supercomplex-related assembly proteins and  
23 mtDNA-encoded subunits within supercomplexes, as well as the complexes of ubiquinone  
24 biosynthesis enzymes and Lactb, a mitochondrial-localized protein implicated in obesity.  
25 Our approach can be applied to broad biological systems. In this instance, comprehensively  
26 analyzing respiratory supercomplexes illuminates previously undetectable complexity in  
27 mitochondrial plasticity.

28

## 29 **Highlights:**

- 30
- 31 • Comprehensive quantification of respiratory subunits within supercomplexes
  - 32 • Complex II and V assemble within supercomplexes
  - Mitochondrial-encoded subunits display elevated upregulation upon exercise training

- 33       • Exercise increases ubiquinone biosynthesis enzyme complexes

34

35   **Keywords:** mitochondrial respiratory complexes, mitochondrial supercomplexes, oxidative  
36 phosphorylation, protein complexes, complexome, exercise

37

## 38 **Introduction**

39 Energy production through oxidative phosphorylation is the primary function of mitochondria.  
40 Oxidative phosphorylation is the process by which adenosine triphosphate (ATP) is formed  
41 via the transfer of electrons through the electron transport system. The electron transport  
42 system is composed of four respiratory complexes (CI to CIV) coupled with ATP-synthase  
43 complex (CV). Electrons from the electron carriers NADH and FADH<sub>2</sub>, which are reduced  
44 during glycolysis, tricarboxylic acid cycle and beta-oxidation, enter the electron transport  
45 system via CI and CII, respectively. Electrons flow through coenzyme Q/ubiquinone, CIII,  
46 cytochrome c, and CIV, resulting in pumping of protons into the intermembrane space. The  
47 resultant chemiosmotic proton-motive force is used by CV to generate ATP from ADP. Thus,  
48 mitochondria play an essential role in cellular metabolism.

49  
50 The organization of the electron transport system has long been debated, with several  
51 models proposed. The *random-collision* model or *fluid* model stated that individual  
52 respiratory complexes are free to diffuse within the inner mitochondrial membrane  
53 (Hackenbrock et al., 1986). Later, the *solid* model, in which complexes were rigidly  
54 superassembled into supercomplexes, was proposed (Schagger and Pfeiffer, 2000).  
55 Presently accepted is the *plasticity* model, which takes into account the co-existence of both  
56 organisations. In this model, respiratory complexes can dynamically exist in isolation and as  
57 supercomplexes depending upon the metabolic requirements of the cell (Acin-Perez et al.,  
58 2008). Furthermore, functional respiration in CI-III-IV-containing respirasomes has been  
59 confirmed (Acin-Perez et al., 2008; Schagger and Pfeiffer, 2000). Supercomplexes are  
60 highly conserved and have been identified in several kingdoms of living organisms (i.e.,  
61 plants, algae, fungi, protozoa and animals) (reviewed in (Chaban et al., 2014)). The  
62 organization of supercomplexes is crucial for individual subunit-complex stability (Acin-  
63 Perez et al., 2008), but is also important to reduce ROS production by facilitating electron  
64 transport across the complexes (Genova and Lenaz, 2014). Clinically, individuals with  
65 genetic mutations in mitochondrial respiratory CI (Ugalde et al., 2004) and CIII (Acin-Perez  
66 et al., 2004) present disturbances in supercomplex assembly and stability. Moreover,  
67 decreased CI-, CIII- and CIV-containing supercomplexes and mitochondrial respiration have  
68 been observed in people with type 2 diabetes (Antoun et al., 2015) and rodent models of  
69 aging (Lombardi et al., 2009). CIII and CIV assembly into supercomplexes has also been

70 correlated to substrate utilization and maximal oxygen uptake in humans (Greggio et al.,  
71 2017). Hence, respiratory supercomplex formation/dynamics is a physiologically and  
72 clinically relevant process.

73

74 The formation and plasticity of supercomplexes remain unclear, primarily due to limitations  
75 in methodological approaches. Techniques to study respiratory supercomplex formation  
76 have typically relied upon Blue Native Polyacrylamide Gel Electrophoresis (BN-PAGE)  
77 coupled to antibody-based detection techniques (i.e., oxidative phosphorylation cocktail  
78 antibody), often covering only a single subunit per complex. However, this approach  
79 provides limited information, relying upon a single subunit to provide representative  
80 information regarding complex incorporation into supercomplexes. In the absence of  
81 additional targeted analyses, these conventional approaches may also disregard the  
82 influence of additional proteins present within supercomplexes, including assembling factors  
83 and soluble electron carriers. To date, different studies have combined one- or two-  
84 dimensional BN-PAGE with mass spectrometry to study individual mitochondrial respiratory  
85 complexes using MALDI-TOF (Farhoud et al., 2005; Sun et al., 2003) or tandem LCMS/MS  
86 (Fandino et al., 2005; Wessels et al., 2009). Furthermore, a BN-PAGE LCMS/MS approach  
87 was used to cut high-molecular weight sections (not individual bands) to either validate  
88 immunoblotting analyses (Greggio et al., 2017) or decipher the composition of individual  
89 complexes through agglomerative clustering based on profile-similarity, namely  
90 complexome profiling (Guerrero-Castillo et al., 2017; Heide et al., 2012; Van Strien et al.,  
91 2019). Thus, while these studies have established a workflow from BN-PAGE to mass  
92 spectrometry, this technique has yet to be applied to the analysis of individually targeted  
93 supercomplexes.

94

95 Mitochondria are highly plastic organelles, rapidly adapting to the metabolic demands of the  
96 cell. Exercise training is a potent stimulus to increase mitochondrial respiration within  
97 skeletal muscle (Holloszy, 1967) and, therefore, provides an ideal stimulus to study  
98 mitochondrial plasticity and supercomplex formation. Using antibody-based detection,  
99 supercomplex formation was recently shown to increase within skeletal muscle following  
100 exercise training in humans (Greggio et al., 2017). Altered stoichiometry of respiratory  
101 complexes within supercomplexes, particularly a redistribution of CI, CIII, and CIV into

102 supercomplexes was identified following exercise training (Greggio et al., 2017). Thus,  
103 endurance exercise provides an ideal model to study plasticity in mitochondrial  
104 supercomplexes.

105

106 In this study we applied an antibody-independent methodology that couples BN-PAGE and  
107 LCMS/MS to assess the mitochondrial supercomplexome. Particularly, we utilize exercise  
108 training in murine skeletal muscle to study mitochondrial plasticity and supercomplex  
109 formation.

110

## 111 **Results and discussion**

### 112 **Exercise increases mitochondrial respiratory protein subunits in a non-** 113 **stoichiometric manner**

114 To study mitochondrial plasticity, female C57BL/6JBomTac mice were provided with free  
115 access to voluntary wheel running for 25 days or remained sedentary. Immunoblot analysis  
116 revealed the expected exercise training-induced increase in hexokinase II and cytochrome  
117 c abundance within various skeletal muscle groups (Fig S1A). The greatest exercise  
118 training-induced adaptations were apparent in triceps; therefore, this muscle group was  
119 selected for subsequent analyses.

120

121 Proteomic analysis of skeletal muscle is challenging due to the presence of highly abundant  
122 contractile proteins hindering the detection of low abundant proteins (Deshmukh et al.,  
123 2015b). We applied a previously established sequential multi-enzyme digestion filter-aided  
124 sample preparation (MED-FASP) strategy (with LysC and trypsin) and quantified 3547  
125 proteins within triceps muscle (Schonke et al., 2018; Wisniewski and Mann, 2012) (Fig 1A,  
126 Table S1). This strategy allows separation and identification of orthogonal populations of  
127 peptides, resulting in increased sequence coverage and depth of the proteome. Principal  
128 component analysis (PCA) of quantified proteins revealed clear separation between  
129 sedentary and exercise-trained groups (Fig 1B). Amongst the 3547 quantified proteins, 951  
130 were increased and 110 were decreased after exercise training (Fig 1C). The list of  
131 significantly increased proteins contains canonical markers of exercise-training such as  
132 hexokinase 2 (Hk2), pyruvate dehydrogenase kinase 4 (Pdk4) and lactate dehydrogenase  
133 D (Ldhd) (Fig 1C). As expected, mitochondrial protein content was increased after exercise

134 training (Fig 1D), as well as proteins from oxidative phosphorylation, tricarboxylic acid cycle  
135 (TCA) and lipid metabolism pathways (Fig 1E). Furthermore, Golgi protein content also  
136 increased (Fig 1D). Conversely, proteins from glycolysis and carbohydrate metabolism  
137 pathways were downregulated (Fig 1E). This proteomic data confirms the increase in  
138 oxidative phosphorylation and shift towards lipid metabolism following endurance exercise  
139 training (Constable et al., 1987; Holloszy, 1967; Holloszy and Oscai, 1969; Holloszy et al.,  
140 1970; Mole et al., 1971). Proteins involved in substrate transport (Fig S1C), the malate-  
141 aspartate shuttle (Fig S1E), the pyruvate dehydrogenase complex (Fig S1H) and the TCA  
142 cycle (Fig S1I) all showed general increases. Moreover, proteins with transit peptide  
143 (shuttled to mitochondria) (Fig S1J) as well as citrate synthase activity (Fig S1K) were  
144 increased upon exercise training. Exercise training also drove an increase in slow-twitch  
145 type I and fast-twitch type IIa myosin heavy chain (MHC) isoforms, along with a decrease in  
146 the faster fiber type protein MHC IIb (Fig S1L). Thus, via the deepest exercise training-  
147 induced skeletal muscle proteome to date, we demonstrate a robust metabolic adaptation  
148 to endurance exercise.

149

150 Due to the profound exercise training-induced mitochondrial biogenesis, we studied the  
151 mitochondrial part of the proteome in greater detail. Within the total proteome, we detected  
152 11 out of 13 mitochondrial DNA-encoded proteins of which 9 were increased after exercise  
153 training (Fig 1F). Indeed, we have excellent coverage across the electron transport system,  
154 with 40 subunits in CI, 4 in CII, 9 in CIII, 14 in CIV and 15 in CV quantified within the proteome  
155 (Fig 1G-K). Although the majority of proteins increased with exercise training, in most of the  
156 complexes, more than one third remained unchanged (Fig 1G-K pie charts: 30% in CI, 22%  
157 in CIII, 29% CIV and 47% CV), suggesting altered stoichiometry of respiratory subunits upon  
158 exercise training. Although a similar association was observed previously with increased  
159 physical activity level (Ubaida-Mohien et al., 2019), the reason for this non-stoichiometric  
160 increase in expression has yet to be clarified. Due to the apparent changes in subunit  
161 stoichiometry, we questioned the validity of inferring adaptations to whole respiratory  
162 complexes from the analysis of a single subunit. Thus, we studied respiratory supercomplex  
163 formation using an integrated BN-PAGE mass-spectrometry approach.

164

165 **Methodological approach to supercomplexome analysis**

166 The emerging field of protein complexome analyses has paved the way for combining BN-  
167 PAGE and LCMS/MS (Guerrero-Castillo et al., 2017; Heide et al., 2012; Van Strien et al.,  
168 2019). The predominant approach has consisted of analyzing a large number of continually  
169 sliced equal-sized bands (60 slices per sample) along the gel (Guerrero-Castillo et al., 2017;  
170 Heide et al., 2012; Van Strien et al., 2019). This allows for the observation of protein  
171 distributions across molecular masses. Agglomerative clustering assigns proteins to  
172 putative complexes based on similar distribution profiles (Giese et al., 2015; Heide et al.,  
173 2012; Van Strien et al., 2019) and thus relies on the assumption that the individual proteins  
174 within each supercomplex possesses constant stoichiometries. Furthermore, this requires  
175 extensive mass spectrometry measurement time. Given the non-stoichiometric change in  
176 respiratory subunits within the triceps proteome we adapted this methodology to excise 10  
177 bands representing known supercomplexes (Fig 2A-B) (Jha et al., 2016) and to allow for  
178 comparisons of protein abundance within distinct bands (i.e. supercomplexes). To  
179 determine the distribution of proteins across the bands, we appropriated a method for  
180 unbiased assignment of proteins to different fractions (traditionally subcellular localizations),  
181 namely protein correlation profiling (PCP) (Andersen et al., 2003; Foster et al., 2006;  
182 Krahmer et al., 2018). Collectively, this approach allows us to simultaneously assess the  
183 abundance and distribution of proteins, specifically within supercomplexes.

184

### 185 **Previously undescribed respiratory subunits within supercomplexes revealed by blue** 186 **native-PAGE mass-spectrometry**

187 The mitochondrial fraction isolated from triceps muscles was separated on a BN-PAGE gel  
188 and bands, representing supercomplexes (Jha et al., 2016), labeled 1-10 were excised after  
189 Coomassie blue staining (Fig 2A-B). In-gel digestion (Shevchenko et al., 2006) and  
190 LCMS/MS analysis of each band resulted in the quantification of 422 proteins across all  
191 bands. We quantified 41 subunits of CI, 2 of CII, 10 of CIII, 15 of CIV and 15 of CV with high  
192 confidence (median unique peptides: 6) across 10 of the supercomplex bands (Fig 2C). In  
193 support of the methodology, the vast majority of proteins quantified are electron transport  
194 system proteins (Fig 2D), validating the excision of respiratory supercomplex bands. As  
195 expected (Jha et al., 2016), we observed the presence of CI subunits in the higher molecular  
196 weight bands (bands 1-8), while CIV was identified across the majority of supercomplexes  
197 (Fig 2C and E). CV showed substantially greater abundance in band 9, making up 95% of

198 the electron transport system protein abundance within this band (Fig 2C and E). These  
199 results are in accordance with previous studies, where oligomers of CV subunits were  
200 detected in a similar region (Greggio et al., 2017; Jha et al., 2016). We detected subunits of  
201 CV within all of the bands analyzed (Fig 2C and E), making up approximately 7-16% of the  
202 total electron transport system protein abundance within bands 1-6 (Fig 2E). This agrees  
203 with a recent study employing cross-linking mass spectrometry to identify interactions within  
204 mitochondrial supercomplexes, which found that CV exists in close spatial proximity, and  
205 may physically interact, with known respirasome complexes (Liu et al., 2018).

206  
207 Strikingly, we quantified the CII subunit succinate dehydrogenase subunit A (Sdha) within  
208 the majority of supercomplex bands (Fig 2C and F). The presence of CII within  
209 supercomplexes has been debated since CII has not been detected within supercomplexes  
210 in all studies (Greggio et al., 2017; Lapuente-Brun et al., 2013; Lenaz and Genova, 2007).  
211 However, CII incorporation into superstructures (Kulawiak et al., 2013) and associations with  
212 other complexes, namely within supercomplexes, also containing CI, III and IV, have been  
213 reported (Acin-Perez et al., 2008; Liu et al., 2018). Furthermore, increased succinate-  
214 induced (i.e., CII) respiration has been identified within these supercomplexes (Acin-Perez  
215 et al., 2008). In our study, Sdha was quantified in most of the bands (with the exception of  
216 band 6; median unique peptides: 8), while Sdhb was only quantified in bands 4 and 10  
217 (median unique peptides: 2; Fig 2C), albeit at a much lower intensity than Sdha (Fig 2F).  
218 Accordingly, Sdha has been described to form a higher number of cross-links with other  
219 respiratory complexes than Sdhb (Liu et al., 2018). The presence of Sdha, but not Sdhb,  
220 within supercomplexes was confirmed by BN-PAGE immunoblotting using subunit-specific  
221 antibodies (Fig 2G). This finding could explain some of the discrepancies in the literature  
222 regarding CII assembly into supercomplexes. A previous study using an antibody against  
223 the lowly expressed Sdhb failed to identify CII within supercomplexes in mouse skeletal  
224 muscle (Lapuente-Brun et al., 2013; Lenaz and Genova, 2007). In contrast, CII has been  
225 detected within specific supercomplexes, by an anti-Sdha antibody (Acin-Perez et al., 2008).  
226 However, another study did not detect Sdha, via immunoblot analysis or mass spectrometry,  
227 in supercomplexes from skeletal muscle of elderly (Greggio et al., 2017), suggesting a  
228 species-specific difference in supercomplex formation. Nonetheless, functional respiration  
229 through CII has only been reported in high-molecular weight murine supercomplexes (Acin-



230 Perez et al., 2008) of approximately similar molecular mass to band 4 identified in the current  
231 study, where both Sdha and Sdhb are detected by mass spectrometry. Thus, while Sdha is  
232 detectable in most bands, whether these are functional succinate-linked respirasomes  
233 remains to be determined. Indeed, Sdhb is necessary for succinate oxidation and electron  
234 transfer, while Sdhb knockout reduces oxygen consumption rate (Kitazawa et al., 2017;  
235 Rutter et al., 2010). Therefore, the functional role of Sdha in the absence of Sdhb remains  
236 unclear.

237

### 238 **Endurance exercise training-induced plasticity in mitochondrial supercomplexes**

239 To study the adaptation of supercomplexes to a stimulus that promotes mitochondrial  
240 biogenesis, we assessed the impact of endurance exercise training. The distribution (PCP)  
241 of respiratory complexes within each band before and after exercise training is displayed in  
242 Fig 3A. The effect of exercise on the distribution of CI, CIII and CV across bands remained  
243 broadly similar, while a redistribution of CIV into bands 3 and 4 and a reduction in the  
244 proportion of CII within bands 3, 4 and 5 was apparent following exercise training. The mean  
245  $\log_2$ -fold-change of the respiratory complexes, as well as complex-related assembly proteins  
246 and cytochrome c was calculated (Fig 3B) and absolute changes, rather than distribution  
247 across bands, were analyzed. Although, the majority of complexes within each  
248 supercomplex show only small changes (typically less than 1  $\log_2$ -fold-change), an increase  
249 within CIV and, to a lesser extent CV, within band 7 was notable (Fig 3B). Both of these  
250 analyses are consistent with a redistribution of CIV into supercomplexes in skeletal muscle  
251 following 4 months of endurance exercise training in elderly sedentary humans (Greggio et  
252 al., 2017). Indeed, the proportion of CIV within supercomplexes may be a determinant of  
253 energy expenditure during exercise and, thus, central to the energetic adaptation to  
254 endurance exercise training (Greggio et al., 2017). However, unlike exercise training in  
255 elderly humans (Greggio et al., 2017), a redistribution of CIII was not apparent (Fig 3A),  
256 which may reflect differences within species or the training mode/duration.

257

258 Analysis of differentially regulated proteins within each band (Figs 3C-L) revealed the  
259 adaptation of each supercomplex to exercise training and identified varied changes across  
260 bands. For example, band 7 displays the clearest regulation of respiratory subunits following  
261 exercise training. Mitochondrial respiratory complex proteins from CI (Ndufa2, Ndufa4,

262 Ndufb1 and Ndufb2), CIV (Cox5a, Cox6a2, Cox6b1 and Cox7a1) and CV (Atp5e) were  
263 increased upon exercise training (Fig 3I). Furthermore, the complex assembly factor  
264 Evolutionary Conserved Signaling Intermediate in Toll Pathways (Ecsit) was also increased  
265 within band 7 (Fig 3I) and band 5 (Fig 3G). Analyses of the volcano plots also identify non-  
266 electron transport system proteins that are regulated by exercise training and form  
267 complexes within a similar mass range. The Coenzyme Q biosynthetic family (COQs)  
268 showed consistent increases across the majority of the bands (bands 1, 2, 4, 5 and 7).  
269 Additionally, lactamase beta (Lactb), a mitochondrial localized protein implicated in obesity  
270 (Chen et al., 2008) was consistently reduced (bands 1, 2, 3, 5, 6, 8, 9 and 10) following  
271 exercise training (Figs 3C-L).

272

### 273 **Potential role of respiratory complex assembly factors in supercomplex assembly**

274 Mitochondrial complex assembly factors play a critical role in the construction of functionally  
275 active respiratory complexes, which can organize themselves into supercomplexes (Ghezzi  
276 and Zeviani, 2012). We investigated the presence of mitochondrial complex assembly  
277 factors (as annotated in HUGO, [genenames.org](http://genenames.org)) and quantified 14 within supercomplex  
278 bands (Fig 4A). This is in comparison to 35 complex assembly factors quantified within the  
279 total triceps proteome (12 for CI, 1 for CII, 5 for CIII, 11 for CIV, 3 for CV; Fig 4C), indicating  
280 that many assembly factors may complete their role prior to the formation of  
281 supercomplexes. Of note, 10 of the 14 complex assembly factors quantified within  
282 supercomplexes are CI assembly factors, reflecting the complicated process of assembling  
283 CI from 44 subunits. In general, PCP analyses revealed higher expression of assembly  
284 factors within low-molecular mass bands (Fig 4A). This agrees with a previous *in vitro* study  
285 whereby almost complete dissociation of CI assembly factors in high-molecular mass  
286 supercomplexes was reported (Guerrero-Castillo et al., 2017). The predominant presence  
287 of assembly factors within bands 7-10 may indicate these as precursors to higher-molecular  
288 mass supercomplexes. The temporal nature of complex assembly and incorporation into  
289 supercomplexes has been debated (Acin-Perez et al., 2008; Guerrero-Castillo et al., 2017;  
290 Moreno-Lastres et al., 2012). Using an antibody-based technique *in vitro*, an incomplete  
291 sub-assembly of CI forms an approximately 830-kDa complex with partially-assembled CIII  
292 and CIV before full assembly of each complex occurs within the formative supercomplex  
293 (Moreno-Lastres et al., 2012). However, in a similar model, albeit utilizing mass-

294 spectrometry-based complexome analysis, evidence was provided to show that  
295 supercomplex assembly occurs only after full assembly of the individual complexes  
296 (Guerrero-Castillo et al., 2017). In our *in vivo* analysis of mature skeletal muscle, we provide  
297 evidence that likely supports the full assembly of individual complexes prior to assembly of  
298 supercomplexes. Indeed, we found almost all subunits of CI could be detected in each of  
299 bands 1-8, including Ndufa6, Ndufa7, Ndufa11 and Ndufab1, which are reported to  
300 assemble in the final steps of CI formation (Guerrero-Castillo et al., 2017) (Fig 2C). There  
301 was also no evidence of partially assembled CI complexing with CIII or CIV, even in the  
302 approximately 830 kDa band 8. Nonetheless, the presence of CI, CII and CIV, with very little  
303 CIII detected within band 8 may indicate an intermediate supercomplex, which precedes the  
304 formation of the CI, (II), III and IV respirasome. Band 8 showed a general trend of  
305 downregulated electron transport system proteins following endurance exercise training  
306 (Figs 3B and J; including CI proteins: Ndufa2, Ndufb2, Ndufb11, Ndufs2; CIV protein:  
307 Cox7a1; and CI assembly protein: Tmem126b), potentially suggesting a shift towards  
308 mature respirasomes during a period of elevated energetic demand.

309  
310 The effect of exercise training upon the 14 complex assembly factors within the  
311 supercomplexes was determined (Fig 4B). Within band 7, we identified the upregulation of  
312 8 assembly factors following endurance exercise training, including the complex I assembly  
313 factor Ecsit (Fig 4B). In addition, 21 assembly factors were upregulated in the total triceps  
314 proteome upon exercise training (Fig 4C). This is in agreement with a study that showed  
315 assembly factor proteins Ndufaf3, Ndufaf4, Uqcc2, Cox20 and Atpaf1 were associated with  
316 higher physical activity in human skeletal muscle (Ubaida-Mohien et al., 2019). Conversely,  
317 we did not observe changes in Sco1 and Uqcc1 upon exercise training, which may reflect  
318 species-specific or methodological (i.e., observational versus interventional) differences.

319  
320 Ecsit, when localized in the mitochondria, is involved in the assembly and stability of CI  
321 (Vogel et al., 2007). To understand the increase in Ecsit incorporation into some  
322 supercomplex bands we studied band 7 in further detail. A protein-protein interaction  
323 network (STRING confidence score > 0.7) was generated for band 7 displaying quantified  
324 mitochondrial complex proteins, complex assembly factors, and soluble electron carrier  
325 related proteins (Fig 4D; Table S4). Increased Ecsit protein abundance was concomitant

326 with upregulated CI, CIV and CV proteins (octagon-shaped). This network revealed 45 high-  
327 confidence protein-protein interactions between Ecsit and other proteins, including proteins  
328 38 subunits of CI and numerous CI assembly factors as well as one CIII protein and one CV  
329 protein (Fig 4D; Table S3). Ecsit is recruited to mitochondria partly due to a N-terminal  
330 mitochondria-targeting sequence (Vogel et al., 2007), where it associates within the  
331 mitochondrial CI assembly complex (MCIA) (including Acad 9, Ndufaf1, Timmdc1 and  
332 Tmem126b (Guarani et al., 2014; Heide et al., 2012) and with other CI assembly proteins  
333 (Ndufaf2 and Ndufaf4). Knockdown of Ecsit results in decreased Ndufaf1 and CI protein  
334 abundance, which ultimately leads to mitochondrial dysfunction (Vogel et al., 2007). Ecsit  
335 knockdown cells also show an increase in superoxide (Koopman et al., 2005) and cytosolic  
336 oxidant levels (Koopman et al., 2006). Collectively, increased Ecsit protein within remodeling  
337 supercomplexes (e.g., band 7) may indicate a role for Ecsit in supercomplex assembly over  
338 and above the assembly of CI.

339

#### 340 **Mitochondrial-encoded subunits display elevated upregulation within** 341 **supercomplexes following exercise training**

342 Mammalian mtDNA encodes for 13 complex subunits: 7 subunits for CI, 1 for CIII, 3 for CIV  
343 and 2 for CV. We identified 11 mitochondrial-encoded respiratory subunits across the  
344 different bands, of which a number were upregulated in several bands after exercise training  
345 (Fig3 C-L; Fig 5A). On average, mitochondrial-encoded subunits display greater  
346 upregulation within supercomplexes than nuclear-encoded subunits for the same complex  
347 (Fig 5B) in response to exercise training, indicative of altered stoichiometry of the subunits  
348 that form supercomplexes. Band 2 shows upregulation of mitochondria-encoded subunits  
349 within CI, CIII, CIV and CV (Fig 5A), in excess of their nuclear-encoded counterparts (Fig  
350 5B). In order to visualize the exercise training-induced regulation of mitochondrial- and  
351 nuclear-encoded proteins within supercomplexes, we generated a protein-protein  
352 interaction network within band 2 (STRING confidence score > 0.7) (Fig 5D; Table S5).  
353 Within this band, particularly for mt-Nd3 and mt-Co3, but also mt-Nd4l and mt-Atp6, exercise  
354 training clearly induces a greater upregulation of mitochondrial-encoded than most nuclear-  
355 encoded subunits (Fig 5D). Moreover, 11 mtDNA subunits were identified in the whole  
356 triceps proteome, with a general upregulated trend upon exercise training (Fig 5C),  
357 corroborating previous evidence (Menshikova et al., 2006; Puntschart et al., 1995; Sae-Tan

358 et al., 2014; Yokokawa et al., 2018). These findings suggest that exercise training increases  
359 mitochondrial-encoded subunit transcription, consistent with increased mtDNA and  
360 mitochondrial genes after different types of exercise (Robinson et al., 2017), or increased  
361 mitochondrial-encoded gene translation. The latter is supported by upregulated  
362 mitochondrial ribosomal proteins upon exercise training in the whole triceps proteome (Fig  
363 5E). Taco1 (Translational activator of cytochrome c oxidase 1), a protein annotated as an  
364 assembly factor, but also a translational activator binding mitochondrial mt-Co1 mRNA and  
365 regulating mitochondrial proteins expression (Richman et al., 2016), was increased in the  
366 whole triceps proteome (Fig 4B), along with mt-Co1 (Fig 5B). This corroborates a previous  
367 observation of voluntary wheel running-induced increase in Taco1 (Lee et al., 2016).  
368 Moreover, the increase in mitochondrial mRNA translational machinery coincides with the  
369 exercise-induced increase in mitochondrial biogenesis (Yokokawa et al., 2018). Taco1  
370 mutations have been associated with CIV deficiency and mitochondrial dysfunction in  
371 human fibroblast primary cells (Weraarpachai et al., 2009) and rodents (Richman et al.,  
372 2016). Collectively, our study provides evidence that exercise-training upregulates  
373 mitochondrial-encoded subunits within supercomplexes, which is coincidental with an  
374 increase in the mitochondrial translational machinery.

375

### 376 **Exercise-training increases the ubiquinone biosynthetic family of COQs**

377 The presence of soluble electron carriers in the electron transport system was proposed  
378 decades ago (Green and Tzagoloff, 1966). Ubiquinone transfers electrons from CI or CII to  
379 CIII, while CytC transfers electrons from CIII to CIV. Electron carriers have previously been  
380 identified in respiratory supercomplexes (Acin-Perez et al., 2008; Althoff et al., 2011). In the  
381 current study, we detected CytC within each supercomplex band, with the exception of bands  
382 6 and 8 (Table S2).

383

384 Ubiquinone biosynthesis enzymes (COQs) form complexes of 700-1300 kDa (Floyd et al.,  
385 2016; Marbois et al., 2009) and, as such, have co-migrated into many of the bands excised  
386 for supercomplex analysis. COQs showed substantial increases in abundance across many  
387 of these bands (Fig 3C-L & Fig 6A). COQ5, COQ7 and COQ9 also showed a significantly  
388 increased concentration in the total triceps proteome, while a similar tendency was apparent  
389 for COQ6 (Fig 6B). Thus, COQ enzymes are upregulated concomitant with the increased

390 metabolic demand in response to endurance exercise training. The upregulation of the COQ  
391 complex has been demonstrated during galactose-induced mitochondrial biogenesis in  
392 HepG2 cells *in vitro* (Floyd et al., 2016), while downregulation of COQ enzymes is apparent  
393 in rodent models of mitochondrial dysfunction (Kuhl et al., 2017). However, to our  
394 knowledge, this is the first demonstration of *in vivo* COQ protein complex regulation following  
395 a mitochondrial biogenic stimulus in mammals. The increase in COQs in response to  
396 exercise training may explain the known increase in ubiquinone content in oxidative skeletal  
397 muscle following exercise training (Gohil et al., 1987). An increase in COQs is also apparent  
398 during mitochondrial biogenesis in liver, as well as white and brown adipose tissue (Aithal  
399 et al., 1968; Bentinger et al., 2003; Gohil et al., 1987; Quiles et al., 1994). Upregulation of  
400 ubiquinone has therapeutic effects, with exogenous ubiquinone administration increases  
401 exercise performance (Alf et al., 2013; Cooke et al., 2008; Ylikoski et al., 1997) and reverses  
402 symptoms of many pathophysiological conditions in humans and animals (Di Giovanni et  
403 al., 2001; Garrido-Maraver et al., 2014; Quinzii and Hirano, 2010; Rotig et al., 2000; Xu et  
404 al., 2010). Future studies should aim to determine whether upregulated COQ enzyme  
405 complexes upregulated ubiquinone within specific pools (e.g., free vs supercomplex bound  
406 pools).

407

#### 408 **Obesogenic Lactb polymers decrease in mitochondria of exercise-trained mice**

409 Our analyses also identified downregulated proteins in all supercomplex bands (Figs 3C-L,  
410 Table S2). For instance, Lactb was downregulated within the majority of the bands (Figs 3C-  
411 L and Fig 6C). The Lactb gene is positively correlated with obesity (Chen et al., 2008; Yang  
412 et al., 2009) and type 2 diabetes (Lau et al., 2017), while Lactb overexpression in transgenic  
413 mice increases fat mass (Chen et al., 2008). Lactb is localized in the mitochondrial  
414 intermembrane space and polymerizes to form filaments with a molecular mass of >600 kDa  
415 (Polianskyte et al., 2009). Therefore, a downregulation of Lactb polymers may confer  
416 metabolic advantages following endurance exercise training. Lactb overexpression reduces  
417 the phospholipids lipophosphatidylethanolamine and phosphatidylethanolamine in  
418 mitochondria of breast cancer cells, but not in non-transformed cells, concomitant with  
419 suppression of tumorigenesis (Keckesova et al., 2017). The metabolic function of Lactb in  
420 non-tumorigenic cells is unclear. Despite a downregulation of Lactb in high-molecular mass  
421 complexes (Fig 3C-L and Fig 6C), Lactb expression in the total proteome shows a non-

422 significant trend to increase (Fig 6D). Thus, polymerization, and not the total content of  
423 Lactb, appears to be influenced by endurance exercise training.

424

## 425 **Conclusion**

426 Limitations in methodologies have constrained the comprehensive investigation of  
427 mitochondrial supercomplex plasticity. Here, we described a BN-PAGE mass spectrometry  
428 approach to study the supercomplexome, which has broad applicability to investigate protein  
429 complexes in various systems. We applied this methodology to identify the composition and  
430 dynamics of respiratory supercomplexes within skeletal muscle. We quantified 41 subunits  
431 of CI, 2 of CII, 10 of CIII, 15 of CIV and 15 of CV across 10 supercomplex bands, identifying  
432 the debated CII and CV as components of respiratory supercomplexes. Furthermore,  
433 mitochondrial respiratory complex assembly proteins were identified in low molecular-mass  
434 supercomplexes, suggesting a role in early supercomplex assembly. We also uncovered  
435 the dynamics of the exercise training-induced supercomplexome and identified the  
436 mitochondrial-encoded proteins within these supercomplexes. Finally, we also identified  
437 additional high-molecular mass complexes, and described the regulation of the ubiquinone  
438 biosynthesis enzyme complex and Lactb polymers in response to exercise training.  
439 Collectively, this not only highlights the power of utilizing a proteomic approach to study  
440 complexes and supercomplexes, but also provides biological insight into the plasticity of  
441 mitochondria during endurance exercise-induced mitochondrial biogenesis.

442

## 443 **Acknowledgments**

444 This work is supported by an unconditional donation from the Novo Nordisk Foundation  
445 (NNF) to NNF Center for Basic Metabolic Research (<http://www.cbmr.ku.dk>) (Grant number  
446 NNF18CC0034900) and NNF Center for Protein Research (<https://www.cpr.ku.dk/>) (Grant  
447 number NNF14CC001). This work was partially supported by an EFSD/Lilly grant to AGF,  
448 Swedish Research Council (2015-00165) and Novo Nordisk Foundation Challenge grants  
449 (NNF14OC0011493) to JRZ, and Novo Nordisk Foundation Excellence Project Award  
450 (NNF14OC0009315) and the Danish Council for Independent Research (DFF 4004-00235)  
451 grants to JTT. We would like to acknowledge Matthias Mann, Erik Richter, Jørgen F.P.  
452 Wojtaszewski, Alberto Santos, Ana Rita Colaço, Rebeca Soria and the MS platform at the  
453 NNF Center for Protein Research.

454

455 **Author's contributions**

456 ASD and JRZ supervised this work. ASD and AGF: hypothesis generation, conceptual  
457 design, data analysis and manuscript preparation. ASD, AGF and BS: Wrote manuscript.  
458 ASD, HBH, SC, JTT, AGF, RMJ and BS: performed experiments. JRZ edited the  
459 manuscript. All authors reviewed the manuscript. ASD is the guarantor of this work and, as  
460 such, had full access to all the data in the study and takes responsibility for the integrity of  
461 the data and the accuracy of the data analysis.

462

463 **Declaration of interests**

464 The authors declare no competing interests.

465



## 466 **Context and Significance**

467 Mitochondria are the powerhouses of the cell, producing the majority of energy to fuel  
468 cellular processes. The study of mitochondria function and composition has implications for  
469 health and disease processes. Here, we present a new approach to comprehensively study  
470 the formation of large protein complexes of the electron transport system (the proteins  
471 responsible for energy production), which provides insight into mechanisms for increased  
472 mitochondrial efficiency with exercise training. This study deciphers the manner in which  
473 proteins assemble within complexes, and how this process is influenced by exercise training,  
474 a known physiological intervention to improve mitochondrial function and general health.  
475 Furthermore, we describe the regulation of additional protein complexes involved in  
476 mitochondrial function and health during exercise training.

## 477 **STAR★ Methods**

### 478 *Key Resource Table*

| Reagent or Resource                              | Source                  | Identifier | RRID        |
|--------------------------------------------------|-------------------------|------------|-------------|
| <b>Antibodies</b>                                |                         |            |             |
| GLUT4 polyclonal antibody, 1:1000                | ThermoFisher Scientific | PA1-1065   | AB_2191454  |
| Hexokinase II (C64G5) Rabbit mAb, 1:1000         | CellSignaling           | 2867       | AB_2232946  |
| Purified Mouse Anti-Cytochrome C, 1:500 (1ug/mL) | BD Biosciences          | 556433     | AB_396417   |
| Mouse monoclonal anti-SDHA antibody, 1:5000      | abcam                   | ab14715    | AB_301433   |
| Mouse monoclonal anti-SDHB antibody, 1:200       | abcam                   | ab14714    | AB_301432   |
| Goat Anti-Mouse IgG (H+L)-HRP Conjugate, 1:3000  | Bio-Rad                 | 1706516    | AB_11125547 |
| Goat Anti-Rabbit IgG (H+L)-HRP Conjugate, 1:5000 | Bio-Rad                 | 1706515    | AB_11125142 |
| <b>Biological samples</b>                        |                         |            |             |

|                                                        |           |         |               |            |
|--------------------------------------------------------|-----------|---------|---------------|------------|
| Murine triceps muscle                                  |           |         | This paper    | N/A        |
| Isolated mitochondria from murine triceps muscle       |           |         | This paper    | N/A        |
| Murine gastrocnemius muscle                            |           |         | This paper    | N/A        |
| <b>Chemicals, Peptides, and Recombinant Proteins</b>   |           |         |               |            |
| 5% digitonin                                           |           |         | Invitrogen    | BN2006     |
| NativePAGE Sample Buffer, 4X                           |           |         | Invitrogen    | BN20032    |
| NativePAGE 5% Coomassie G-250 sample additive          |           |         | Invitrogen    | BN2004     |
| NativePAGE Running Buffer, 20X                         |           |         | Invitrogen    | BN2001     |
| Coomassie Brilliant Blue G-250                         |           |         | Serva         | 17524      |
| NativePAGE 3-12% Bis-Tris Protein Gels 1.0mm × 10 well |           |         | Invitrogen    | BN2011BX10 |
| NativeMark™ Standard                                   | Unstained | Protein | Invitrogen    | LC0725     |
| Trans-Blot® Turbo™ 5x Transfer Buffer                  |           |         | Bio-Rad       | 10026938   |
| Trans-Blot® Turbo™ Transfer Pack                       | Midi      | PVDF    | Bio-Rad       | 1704157    |
| Blocking solution (3% Skimmed Milk)                    |           |         | Sigma-Aldrich | 70166      |
| Immobilon® Forte Substrate                             | Western   | HRP     | Millipore     | WBLUF0100  |
| TBS 10X                                                |           |         | In house      |            |
| Tween 20, 100% Nonionic Detergent                      |           |         | Bio-Rad       | 170-6531   |
| Acetyl-CoA sodium salt                                 |           |         | Sigma-Aldrich | A2056      |
| 5,5'-dithiobis(2-nitrobenzoic acid)                    |           |         | Sigma-Aldrich | D8130      |
| Oxaloacetic acid                                       |           |         | Sigma-Aldrich | O4126      |
| <b>Critical Commercial Assays</b>                      |           |         |               |            |

|                                               |                                                                                                                 |                            |                |
|-----------------------------------------------|-----------------------------------------------------------------------------------------------------------------|----------------------------|----------------|
| Pierce™ BCA Protein Assay Kit                 | ThermoFisher                                                                                                    | 23225                      |                |
|                                               | er                                                                                                              |                            |                |
| <b>Deposited Data</b>                         |                                                                                                                 |                            |                |
| Raw and processed MS data                     | ProteomeXchange Consortium                                                                                      | ProteomeXchange: PXD016289 | SCR_004055     |
| <b>Experimental Models: Organisms/Strains</b> |                                                                                                                 |                            |                |
| Mouse: female wild-type                       | Taconic                                                                                                         | N/A                        | C57BL/6JBomTac |
| <b>Software and Algorithms</b>                |                                                                                                                 |                            |                |
| Graphpad Prism 8.0 for statistical analysis   | <a href="https://www.graphpad.com/">https://www.graphpad.com/</a>                                               | N/A                        | SCR_002798     |
| MaxQuant                                      | <a href="https://maxquant.org/">https://maxquant.org/</a>                                                       | Free                       | SCR_014485     |
| Perseus                                       | <a href="http://www.coxdocs.org/doku.php?id=perseus:start">http://www.coxdocs.org/doku.php?id=perseus:start</a> | Free                       | SCR_015753     |
| Cytoscape v3.7.1                              | <a href="http://www.cytoscape.org">www.cytoscape.org</a>                                                        | Free                       | SCR_003032     |

479

480 *Lead contact and materials availability*

481 Requests for reagents and resources should be directed to the Lead Contact, Atul S.  
 482 Deshmukh ([atul.deshmukh@sund.ku.dk](mailto:atul.deshmukh@sund.ku.dk)) (Blegdamsvej 3B (07-8-19) - 2200 Copenhagen,  
 483 Denmark).

484

485 *Animal and cell culture experiments*

486 All animal experiments were approved by the Danish Animal Experimental Inspectorate and  
 487 complied with the European Convention for the Protection of Vertebrate Animals Used for

488 Scientific Purposes. Animals used in these experiments were 10- to 14-week old  
489 C57BL/6JBomTac female mice from Taconic and were kept on a 12:12 hour light-dark cycle  
490 with unlimited access to standard rodent diet and water *ad libitum*. Animals were divided  
491 into two experimental groups: sedentary and exercise trained. Mice were single-housed and  
492 the trained mice had access to a running wheel for 25 days. Running wheels were blocked  
493 24h before they were euthanized at the end of the intervention, and *extensor digitorum*  
494 *longus*, *soleus*, *triceps brachii*, *gastrocnemius* and *quadriceps* skeletal muscle were  
495 collected. We observed larger exercise training effects in triceps muscle; as such this muscle  
496 group was selected for subsequent analyses. C2C12 muscle cells were grown and  
497 differentiated as described before (Deshmukh et al., 2015a).

498

#### 499 *Sample preparation for total proteome of triceps muscle*

500 Triceps muscles and differentiated C2C12 cells were lysed in 0.1 M Tris-HCl, pH 7.5, 0.1 M  
501 DTT and 4% SDS, homogenized with an Ultra Turbax blender (IKA) and boiled for 5 min.  
502 The lysate was sonicated and clarified by centrifugation at 14000 rpm for 10 min. Samples  
503 were then processed following filter-aided sample preparation protocol using sequential  
504 endopeptidases LysC and trypsin for protein digestion (MED-FASP) (Wisniewski and Mann,  
505 2012). Peptide fractions from LysC and trypsin digestion were then purified on C<sub>18</sub> stage-  
506 tips (Rappsilber et al., 2003) prior to LCMS/MS analysis. The C2C12 muscle cells were  
507 included in the analysis to enhance protein identification by using the 'match between runs'  
508 algorithm in MaxQuant software (MaxQuant, RRID SCR\_014485)(Schonke et al., 2018;  
509 Tyanova et al., 2016). The analysis was performed on n=5 biological replicates from each  
510 group (Sedentary, Training).

511

#### 512 *Blue native polyacrylamide gel electrophoresis (BN-PAGE) and in gel digestion*

513 Fresh triceps muscle was homogenized in mitochondria isolation buffer (100 mM sucrose,  
514 100 mM KCl, 50 mM Tris-HCl, KH<sub>2</sub>PO<sub>4</sub> 1 mM, 0.1 mM EGTA, 0.2% BSA) supplemented  
515 with the protease Nagarse. The lysate was cleared by low-speed centrifugation (750 g, 10  
516 min), followed by high-speed centrifugation (10000 g, 10 min) to enrich for the mitochondrial  
517 fraction. The mitochondrial fraction was washed in isolation buffer and mitochondrial protein  
518 (50 µg) was prepared for electrophoresis on NativePAGE Novex 3-12% Bis-Tris Protein  
519 Gels (Invitrogen) as previously described (Jha et al., 2016). NativePAGE Sample Buffer

520 (Invitrogen), 5% digitonin and 5% Coomassie G-250 was added to mitochondrial pellet and  
521 was electrophoresed at 150 V for 30 min at 4°C followed by 60 min at 250 V. Protein bands  
522 were visualized by Coomassie G-250 staining. Unstained marker bands (NativeMARK,  
523 Invitrogen) were visualized after fixation with 25% isopropanol and 10% acetic acid, and  
524 stained with 10% acetic acid and 60 mg/L of Coomassie R-250. Ten selected putative  
525 supercomplex bands, determined as described previously (Jha et al., 2016), were excised  
526 and cut into 1\*1mm pieces followed by in-gel digestion as described (Shevchenko et al.,  
527 2006). Peptides from the trypsin digestion were then purified on C<sub>18</sub> stage-tips (Rappsilber  
528 et al., 2007) before LCMS/MS analysis. The analysis was performed on n=4 biological  
529 replicates from each group (Sedentary, Exercise Training)

530

### 531 *LCMS/MS analysis*

532 For the total proteome analysis, the peptides from the triceps muscles and C2C12s were  
533 measured with identical chromatographic conditions. Peptides were injected on a 50 cm  
534 C<sub>18</sub>-particle packed column (inner diameter 75 µm, 1.8 µm beads, Dr. Maisch GmbH,  
535 Germany) with Buffer A (0.5% formic acid) and separated over a 150-min linear gradient  
536 from 5-40% Buffer B (80% acetonitrile, 0.5% formic acid) at a flow rate of 250 nL/minute.  
537 The Easy nano-flow HPLC system was coupled to a LTQ Q-Exactive HF Orbitrap mass  
538 spectrometer via a nanoelectrospray source (all from Thermo Fisher Scientific, Germany).  
539 Mass spectra were acquired in a data-dependent manner, with automatic switching between  
540 MS and MS/MS using a top-12 method. MS spectra were acquired in the Orbitrap analyzer  
541 with a mass range of 300-1750 m/z and 60,000 resolutions at m/z 200. HCD peptide  
542 fragments acquired at 28 normalized collision energy were analyzed at high resolution in  
543 the Orbitrap analyzer. For the mitochondrial supercomplex proteome, peptides from in-gel  
544 digested samples were injected on a 15 cm C<sub>18</sub>-particle packed column (inner diameter 75  
545 µm, 1.8 µm beads, Dr. Maisch GmbH, Germany) with Buffer A (0.5% formic acid) and  
546 separated over a 65-minute linear gradient from 5-40% Buffer B (80% acetonitrile, 0.5%  
547 formic acid) at a flow rate of 250 nL/minute. The Easy nano-flow HPLC system was coupled  
548 to a LTQ Q-Exactive HFX Orbitrap mass spectrometer via a nanoelectrospray source (all  
549 from Thermo Fisher Scientific, Germany). Mass spectra were acquired in a data-dependent  
550 manner, with automatic switching between MS and MS/MS using a top-12 method. MS  
551 spectra were acquired in the Orbitrap analyzer with a mass range of 300-1750 m/z and

552 60,000 resolutions at m/z 200. HCD peptide fragments acquired at 28 normalized collision  
553 energy were analyzed at high resolution in the Orbitrap analyzer.

554

#### 555 *Mass spectrometry data analysis*

556 Raw MS files were analyzed using MaxQuant software (<https://www.maxquant.org/>; RRID  
557 SCR\_014485) (Tyanova et al., 2016). MS/MS spectra were searched by the Andromeda  
558 search engine (integrated into MaxQuant) against the decoy UniProt-mouse database  
559 supplemented with 262 frequently observed contaminants and forward and reverse  
560 sequences. In the main Andromeda search, precursor mass and fragment mass were  
561 matched with an initial mass tolerance of 6 and 20 ppm, respectively. The search included  
562 variable modification of methionine oxidation and N-terminal acetylation and fixed  
563 modification of carbamidomethyl cysteine. Minimal peptide length was set to seven amino  
564 acids, and a maximum of two miscleavages were allowed. For the peptides and protein  
565 identification, the false discovery rate (FDR) was set to 0.01. MS runs from the triceps  
566 muscle and C2C12 myotubes were analyzed with the 'match between runs' option in  
567 MaxQuant. For matching, a retention time window of 30 s was selected. When all identified  
568 peptides were shared between two proteins, results were combined and reported as one  
569 protein group. In the case of myosin heavy chain proteins (Fig S1L), protein quantification  
570 was performed only with unique peptides.

571

#### 572 *Protein quantification*

573 For the triceps proteome, protein abundance (concentrations) were calculated based on the  
574 'Proteomics ruler' concept (Wisniewski, 2017; Wisniewski et al., 2014). The raw protein  
575 intensities for individual proteins were divided by the summed signals of all proteins (on the  
576 basis of peptide identification) to obtain normalized total protein abundance. These values  
577 were further divided by the molecular weight of the proteins to yield the protein  
578 concentrations in pmol/mg of protein. Protein quantification for the mitochondrial  
579 supercomplexes was based on the MaxLFQ algorithm integrated into the MaxQuant  
580 software (RRID SCR\_014485) (Cox et al., 2014).

581

#### 582 *Bioinformatics analysis*

583 Bioinformatics analysis was done in the Perseus software  
584 (<http://www.coxdocs.org/doku.php?id=perseus:start>; RRID SCR\_015753). Categorical  
585 annotation was supplied in the form of Gene Ontology (GO) biological process (BP),  
586 molecular function (MF), and cellular component (CC). All annotations were extracted from  
587 the UniProt database. To retain sufficiently informative protein expression profiles for further  
588 analysis, the quantified proteins were filtered to have at least 3 valid values in at least one  
589 group (Sedentary, Training). The data was imputed to fill missing abundance values by  
590 drawing random numbers from a Gaussian distribution with a standard deviation of 30% and  
591 a downshift of 1.8 standard deviations from the mean. The imputed values have been tuned  
592 in order to simulate the distribution of low abundant proteins. The principal component  
593 analysis was performed on the imputed data matrix. For the total triceps proteome  
594 comparison between sedentary and the training groups, two samples *t*-test was performed  
595 (FDR = 0.05,  $s_0 = 0.1$ ). Results are presented as mean  $\pm$  SEM. When comparing the  
596 mitochondrial proteome (BN-PAGE) between the sedentary and trained group, differentially  
597 expressed proteins were identified using an *a posteriori* information fusion scheme  
598 combining the biological relevance (fold-change) and the statistical significance (p-value) as  
599 described previously (Xiao et al., 2014). A  $\Pi$ -value significance score cut-off of 0.05 was  
600 selected.

601

#### 602 *Protein correlation profile (PCP):*

603 The relative distribution of respiratory subunits across each band was calculated based on  
604 the PCP (Protein correlation profiling), a proteomics method for unbiased assignment of  
605 proteins to multiple fractions (often subcellular localizations) (Andersen et al., 2003; Foster  
606 et al., 2006; Kraemer et al., 2018). The protein abundance profiles from the analyzed gel  
607 bands was derived by scaling intensities for each quantified proteins over all bands within  
608 individual lane to a value of 0 to 1. Median PCP values for individual complexes within  
609 groups (sedentary and training) are also presented in Fig 3.

610

#### 611 *Protein-protein interaction network analysis*

612 Functional protein interaction networks were mapped using the STRING database  
613 (Szklarczyk et al., 2015) and further processed with Cytoscape ([www.cytoscape.org](http://www.cytoscape.org); RRID  
614 SCR\_003032). For the inclusion of an interaction in the network mapping a very high

615 confidence score (0.7) was required. For the network analysis, all oxidative phosphorylation  
616 proteins, electron carriers and mitochondrial respiratory complex assembly factors were  
617 included for the bands analyzed.

618

#### 619 *Immunoblot analysis*

620 Western blot was performed with lyzed samples from muscles *extensor digitorum longus*,  
621 *soleus*, *triceps*, *gastrocnemius* and *quadriceps* for immunoblotting for GLUT4 (#PA1-1065  
622 Thermo Fisher, RRID AB\_2191454), hexokinase II (HKII, Cell Signalling, 2867, RRID  
623 AB\_2232946) and CytC (BD Biosciences #556433, RRID AB\_396417).

624

625 For BN-PAGE, after electrophoresis, the complexes were transferred onto PVDF  
626 membranes (semidry transfer, BioRad Trans-Blot Turbo, high molecular weight program, 10  
627 min) and probed with specific antibodies against Sdha (abcam ab14715, RRID AB\_301433)  
628 and Sdhb (abcam ab14714, RRID AB\_301432). Chemiluminescent membranes were  
629 imaged using the ChemiDoc XRS+ (Bio-Rad, CA, USA).

630

#### 631 *Citrate synthase activity assay*

632 Gastrocnemius muscle was pulverized, lyzed and centrifuged prior to supernatant collection.  
633 The citrate synthase activity assay (based on (Alp et al., 1976)) consisted on a citrate  
634 synthase activity reaction mix (0.1 M Tris HCl, pH 8.1, 0.4 mM acetyl-CoA sodium salt  
635 (Sigma-Aldrich) and 1  $\mu$ M 5,5'-dithiobis(2-nitrobenzoic acid) (Sigma-Aldrich)) added to  
636 muscle protein extract prior to absorbance measurement (412 nm) every 30 s for 5 min  
637 (basal slope) followed by addition of oxaloacetic acid (10 mM) and remeasurements every  
638 30 s for another 5 min (reaction slope). The citrate synthase activity was calculated from the  
639 delta of the reaction and basal slopes and is presented in  $\mu$ mol/min/g protein.

640

#### 641 *Data availability*

642 The mass spectrometry proteomics data have been deposited to the ProteomeXchange  
643 Consortium (SCR\_004055) via the PRIDE partner repository (Perez-Riverol et al., 2019)  
644 with the dataset identifier PXD016289.

645

#### 646 **Figure legends**



647

648 **Figure 1. Effects of exercise training on skeletal muscle proteome.** A: Experimental  
649 design for the study. C57BL/6JBomTac mice were single-housed with or without access to  
650 wheel running for 25 days (n=5 per group). Triceps were collected and MED-FASP sample  
651 preparation was performed prior to LC-MS/MS analysis. B: Principal component analysis  
652 (PCA) segregates the two experimental groups. C: Volcano plot shows all the quantified  
653 proteins (110 decreased and 951 increased proteins after exercise). D: Concentration of  
654 proteins annotated to different cellular compartments (GOCC). E: Percentage of protein  
655 abundance annotated to different molecular functions (GOBP, KEGG for Oxidative  
656 phosphorylation). F: Mitochondrial-encoded proteins identified in the proteome, indicated as  
657 increased (red), unchanged (black) or undetected (white). G-J: Protein concentration in the  
658 triceps proteome for subunits of NADH-dehydrogenase (CI, G), succinate dehydrogenase  
659 (CII, H), cytochrome bc1 (CIII, I), cytochrome oxidase (CIV, K), and ATP synthase (CV, J).  
660 Complex subunits labeled in red are increased upon exercise training, whilst those in black  
661 displayed no significant change. Pie charts in G-J show the proportion of subunits  
662 increased/unchanged per complex. Sed: sedentary; Train: exercise trained. All data is  
663 represented as mean  $\pm$  SEM. \*p<0.05, \*\*p<0.01, \*\*\*p<0.001, \*\*\*\*p<0.0001.

664

665 **Figure 2. Assessment of mitochondrial supercomplexes by BN-PAGE and LCMSMS.**  
666 A: Experimental workflow for the study of supercomplex proteomics: mitochondria were  
667 isolated from triceps skeletal muscle (n=4 per group) and run in a BN-PAGE gel. Individual  
668 bands representing supercomplexes were excised and digested by in-gel digestion prior to  
669 LC-MS/MS measurements and data analysis. Protein correlation profile (PCP) of each  
670 protein was calculated, and protein-protein interaction networks were generated for some of  
671 the bands. B: BN-PAGE image with the different individual bands that were excised per  
672 sample. C: PCP heatmap with all the quantified mitochondrial complex subunits within  
673 sedentary mice. D: Percentage abundance of oxidative phosphorylation proteins within  
674 individual bands (oxidative phosphorylation LFQ intensity within each band is normalized by  
675 total LFQ intensity of that band; mean for sedentary group is represented). E: Summed  
676 percentage abundance of proteins making up each mitochondrial complex within each band.  
677 F: Percentage abundance of Sdha and Sdhb within each band (Sdha and Sdhb LFQ

678 intensity within each band is normalized by total band LFQ intensity of that band; mean  $\pm$   
679 SEM for sedentary group is represented). H: BN-PAGE immunoblot for Sdha and Sdhb.

680

681 **Figure 3. Exercise induces a redistribution of mitochondrial complexes and**  
682 **expression within supercomplexes.** A: PCP plot displaying median PCP values of  
683 different mitochondrial complexes across the bands (sedentary and trained). B: Bubble chart  
684 displaying the mean log<sub>2</sub>-fold-change for each group of oxidative phosphorylation related  
685 proteins (mitochondrial complexes, CytC and complex assembly factors – CAF) upon  
686 exercise training. C-L: Volcano plots displaying total number of quantified proteins in each  
687 band, as well as proteins which were upregulated (red arrow, orange points) and  
688 downregulated (green arrow, purple points) in response to exercise in each band (trained  
689 vs sedentary). Sed: sedentary; Train: exercise trained.

690

691 **Figure 4. Complex assembly factors in supercomplex regulation.** A: PCP heatmap  
692 including all the quantified mitochondrial complex subunits within sedentary mice. B:  
693 Heatmap representing log<sub>2</sub>-fold-change (trained vs sedentary) for complex assembly factors  
694 across all bands. C: Protein concentration in the triceps proteome for complex assembly  
695 factors. Data is represented as mean  $\pm$  SEM. \*p<0.05, \*\*p<0.01. C: Protein-protein  
696 interaction network (STRING confidence score 0.7) generated from oxidative  
697 phosphorylation proteins, CytC and complex assembly proteins in band 7. Edge color  
698 indicates the combined score of the interaction, while node size indicates log<sub>2</sub>-fold-change  
699 with hexagonal nodes indicating a significantly regulated protein ( $\pi$  value < 0.05; (Xiao et  
700 al., 2014)). Sed: sedentary; Train: exercise trained.

701

702 **Figure 5. Mitochondrial-encoded oxidative phosphorylation proteins are upregulated**  
703 **in supercomplexes following exercise training.** A: Heatmap displaying log<sub>2</sub>-fold-change  
704 (trained vs sedentary) for mitochondrial-encoded oxidative phosphorylation proteins across  
705 the different bands. B: Bubble chart displaying the log<sub>2</sub>-fold-change for mitochondrial- and  
706 nuclear-encoded proteins for each complex within supercomplexes. C: Protein  
707 concentration of mitochondrial-encoded oxidative phosphorylation proteins in the triceps  
708 proteome. Data is represented as mean  $\pm$  SEM. \*p<0.05, \*\*p<0.01. D: Protein-protein  
709 interaction network (STRING confidence score 0.7) generated from oxidative

710 phosphorylation proteins, CytC and complex assembly proteins in band 2. E: Total protein  
711 concentration in the triceps proteome for proteins of mitochondrial ribosomal proteins. Sed:  
712 sedentary; Train: exercise trained.

713

714 **Figure 6. Effect of exercise on non-oxidative phosphorylation protein complexes.** A:  
715 Heatmap displaying log<sub>2</sub>-fold-change (trained vs sedentary) for ubiquinone biosynthetic  
716 family of COQ proteins across the different bands. B: Protein concentration of COQ proteins  
717 in the triceps proteome. C: Heatmap displaying log<sub>2</sub>-fold-change (trained vs sedentary) for  
718 Lactb protein across the different bands. D: Protein concentration of Lactb in the triceps  
719 proteome. Data is represented as mean ± SEM. \*p<0.05, \*\*p<0.01. Sed: sedentary; Train:  
720 exercise trained.

721

722 **Figure S1.** A: Western blotting-based quantification of GLUT4, HKII and CytC protein levels  
723 in sedentary and trained mice (n=5 per group). B: Schematic of different pathways studied  
724 (C-I). C-I: Protein concentration in the triceps proteome for substrate transporter proteins  
725 (C), glucose metabolism proteins (D), malate-aspartate shuttle proteins (E), glycerol-3-  
726 phosphate shuttle proteins, (F), lactate transport proteins (G), pyruvate dehydrogenase  
727 (PDH) complex proteins (H), and tricarboxylic acid (TCA) cycle proteins (I). J-K: Total protein  
728 concentration in the triceps proteome for proteins with transit peptides (J). K: Citrate  
729 synthase activity by addition of oxaloacetate (OAA). L: Protein concentration in the triceps  
730 proteome for fiber type specific proteins. All data is represented as mean ± SEM. \*p<0.05,  
731 \*\*p<0.01, \*\*\*p<0.001, \*\*\*\*p<0.0001. Sed: sedentary; Train: exercise trained; HK:  
732 hexokinase 2.

733

734 **TableS1.** Proteins quantified in triceps muscle proteome (n=5 per group).  
735 <https://drive.google.com/open?id=1dTyanzEpu2G5v0LqI-gjBTB2Ac3zeAj>

736

737 **TableS2.** Mitochondrial proteins quantified from BN-PAGE gel bands (n=4 per group).  
738 <https://drive.google.com/open?id=1dTyanzEpu2G5v0LqI-gjBTB2Ac3zeAj>

739

740 **TableS3.** Protein correlation profile values for oxidative phosphorylation proteins  
741 <https://drive.google.com/open?id=11DWzg9f5K3MkGpcF3u1-Lu9-kEKXIQ-S>

742

743 TableS4. Protein-protein interaction matrix from oxidative phosphorylation proteins in band  
744 7.

745 [https://drive.google.com/open?id=1\\_WggKgr6z1A-IrTcmJG56KOy8F-VVPAh](https://drive.google.com/open?id=1_WggKgr6z1A-IrTcmJG56KOy8F-VVPAh)

746

747 TableS5. Protein-protein interaction matrix from oxidative phosphorylation proteins in band  
748 2.

749 <https://drive.google.com/open?id=1d3o6FseD0MBgBuuJL4bw0ZvdSJCi-Ezu>

750

751

752

753

## References

754

755 Acin-Perez, R., Bayona-Bafaluy, M.P., Fernandez-Silva, P., Moreno-Loshuertos, R.,  
756 Perez-Martos, A., Bruno, C., Moraes, C.T., and Enriquez, J.A. (2004). Respiratory  
757 complex III is required to maintain complex I in mammalian mitochondria. *Mol Cell* 13, 805-  
758 815.

759 Acin-Perez, R., Fernandez-Silva, P., Peleato, M.L., Perez-Martos, A., and Enriquez, J.A.  
760 (2008). Respiratory active mitochondrial supercomplexes. *Mol Cell* 32, 529-539.

761 Aithal, H.N., Joshi, V.C., and Ramasarma, T. (1968). Effect of cold exposure on the  
762 metabolism of ubiquinone in the rat. *Biochim Biophys Acta* 162, 66-72.

763 Alf, D., Schmidt, M.E., and Siebrecht, S.C. (2013). Ubiquinol supplementation enhances  
764 peak power production in trained athletes: a double-blind, placebo controlled study. *J Int*  
765 *Soc Sports Nutr* 10, 24.

766 Alp, P.R., Newsholme, E.A., and Zammit, V.A. (1976). Activities of citrate synthase and  
767 NAD<sup>+</sup>-linked and NADP<sup>+</sup>-linked isocitrate dehydrogenase in muscle from vertebrates and  
768 invertebrates. *Biochem J* 154, 689-700.

769 Althoff, T., Mills, D.J., Popot, J.L., and Kuhlbrandt, W. (2011). Arrangement of electron  
770 transport chain components in bovine mitochondrial supercomplex I1III2IV1. *EMBO J* 30,  
771 4652-4664.

772 Andersen, J.S., Wilkinson, C.J., Mayor, T., Mortensen, P., Nigg, E.A., and Mann, M.  
773 (2003). Proteomic characterization of the human centrosome by protein correlation  
774 profiling. *Nature* 426, 570-574.

775 Antoun, G., McMurray, F., Thrush, A.B., Patten, D.A., Peixoto, A.C., Slack, R.S.,  
776 McPherson, R., Dent, R., and Harper, M.E. (2015). Impaired mitochondrial oxidative  
777 phosphorylation and supercomplex assembly in rectus abdominis muscle of diabetic  
778 obese individuals. *Diabetologia* 58, 2861-2866.

779 Bentinger, M., Turunen, M., Zhang, X.X., Wan, Y.J., and Dallner, G. (2003). Involvement of  
780 retinoid X receptor alpha in coenzyme Q metabolism. *J Mol Biol* 326, 795-803.

781 Chaban, Y., Boekema, E.J., and Dudkina, N.V. (2014). Structures of mitochondrial  
782 oxidative phosphorylation supercomplexes and mechanisms for their stabilisation. *Biochim*  
783 *Biophys Acta* 1837, 418-426.

784 Chen, Y., Zhu, J., Lum, P.Y., Yang, X., Pinto, S., MacNeil, D.J., Zhang, C., Lamb, J.,  
785 Edwards, S., Sieberts, S.K., et al. (2008). Variations in DNA elucidate molecular networks  
786 that cause disease. *Nature* 452, 429-435.

787 Constable, S.H., Favier, R.J., McLane, J.A., Fell, R.D., Chen, M., and Holloszy, J.O.  
788 (1987). Energy metabolism in contracting rat skeletal muscle: adaptation to exercise  
789 training. *Am J Physiol* 253, C316-322.

790 Cooke, M., Iosia, M., Buford, T., Shelmadine, B., Hudson, G., Kerksick, C., Rasmussen,  
791 C., Greenwood, M., Leutholtz, B., Willoughby, D., et al. (2008). Effects of acute and 14-day  
792 coenzyme Q10 supplementation on exercise performance in both trained and untrained  
793 individuals. *J Int Soc Sports Nutr* 5, 8.

794 Cox, J., Hein, M.Y., Lubner, C.A., Paron, I., Nagaraj, N., and Mann, M. (2014). Accurate  
795 proteome-wide label-free quantification by delayed normalization and maximal peptide  
796 ratio extraction, termed MaxLFQ. *Mol Cell Proteomics* 13, 2513-2526.

797 Deshmukh, A.S., Cox, J., Jensen, L.J., Meissner, F., and Mann, M. (2015a). Secretome  
798 analysis of lipid-induced insulin resistance in skeletal muscle cells by a combined  
799 experimental and bioinformatics workflow. *J Proteome Res* 14, 4885-4895.

800 Deshmukh, A.S., Murgia, M., Nagaraj, N., Treebak, J.T., Cox, J., and Mann, M. (2015b).  
801 Deep proteomics of mouse skeletal muscle enables quantitation of protein isoforms,  
802 metabolic pathways, and transcription factors. *Mol Cell Proteomics* 14, 841-853.

803 Di Giovanni, S., Mirabella, M., Spinazzola, A., Crociani, P., Silvestri, G., Broccolini, A.,  
804 Tonali, P., Di Mauro, S., and Servidei, S. (2001). Coenzyme Q10 reverses pathological  
805 phenotype and reduces apoptosis in familial CoQ10 deficiency. *Neurology* 57, 515-518.

806 Fandino, A.S., Rais, I., Vollmer, M., Elgass, H., Schagger, H., and Karas, M. (2005). LC-  
807 nanospray-MS/MS analysis of hydrophobic proteins from membrane protein complexes  
808 isolated by blue-native electrophoresis. *J Mass Spectrom* 40, 1223-1231.

809 Farhoud, M.H., Wessels, H.J., Steenbakkers, P.J., Mattijssen, S., Wevers, R.A., van  
810 Engelen, B.G., Jetten, M.S., Smeitink, J.A., van den Heuvel, L.P., and Keltjens, J.T.  
811 (2005). Protein complexes in the archaeon *Methanothermobacter thermoautotrophicus*  
812 analyzed by blue native/SDS-PAGE and mass spectrometry. *Mol Cell Proteomics* 4, 1653-  
813 1663.

814 Floyd, B.J., Wilkerson, E.M., Veling, M.T., Minogue, C.E., Xia, C., Beebe, E.T., Wrobel,  
815 R.L., Cho, H., Kremer, L.S., Alston, C.L., et al. (2016). Mitochondrial Protein Interaction  
816 Mapping Identifies Regulators of Respiratory Chain Function. *Mol Cell* 63, 621-632.

817 Foster, L.J., de Hoog, C.L., Zhang, Y., Zhang, Y., Xie, X., Mootha, V.K., and Mann, M.  
818 (2006). A mammalian organelle map by protein correlation profiling. *Cell* 125, 187-199.

819 Garrido-Maraver, J., Cordero, M.D., Oropesa-Avila, M., Fernandez Vega, A., de la Mata,  
820 M., Delgado Pavon, A., de Miguel, M., Perez Calero, C., Villanueva Paz, M., Cotan, D., et  
821 al. (2014). Coenzyme q10 therapy. *Mol Syndromol* 5, 187-197.

822 Genova, M.L., and Lenaz, G. (2014). Functional role of mitochondrial respiratory  
823 supercomplexes. *Biochim Biophys Acta* 1837, 427-443.

824 Ghezzi, D., and Zeviani, M. (2012). Assembly factors of human mitochondrial respiratory  
825 chain complexes: physiology and pathophysiology. *Adv Exp Med Biol* 748, 65-106.

826 Giese, H., Ackermann, J., Heide, H., Bleier, L., Drose, S., Wittig, I., Brandt, U., and Koch,  
827 I. (2015). NOVA: a software to analyze complexome profiling data. *Bioinformatics* 31, 440-  
828 441.

829 Gohil, K., Rothfuss, L., Lang, J., and Packer, L. (1987). Effect of exercise training on tissue  
830 vitamin E and ubiquinone content. *J Appl Physiol* (1985) 63, 1638-1641.

831 Green, D.E., and Tzagoloff, A. (1966). The mitochondrial electron transfer chain. *Arch*  
832 *Biochem Biophys* 116, 293-304.

833 Greggio, C., Jha, P., Kulkarni, S.S., Lagarrigue, S., Broskey, N.T., Boutant, M., Wang, X.,  
834 Conde Alonso, S., Ofori, E., Auwerx, J., et al. (2017). Enhanced respiratory chain  
835 supercomplex formation in response to exercise in human skeletal muscle. *Cell Metab* 25,  
836 301-311.

837 Guarani, V., Paulo, J., Zhai, B., Huttlin, E.L., Gygi, S.P., and Harper, J.W. (2014).  
838 TIMMDC1/C3orf1 functions as a membrane-embedded mitochondrial complex I assembly  
839 factor through association with the MCIA complex. *Mol Cell Biol* 34, 847-861.

840 Guerrero-Castillo, S., Baertling, F., Kownatzki, D., Wessels, H.J., Arnold, S., Brandt, U.,  
841 and Nijtmans, L. (2017). The assembly pathway of mitochondrial respiratory chain  
842 complex I. *Cell Metab* 25, 128-139.

843 Hackenbrock, C.R., Chazotte, B., and Gupte, S.S. (1986). The random collision model and  
844 a critical assessment of diffusion and collision in mitochondrial electron transport. *J*  
845 *Bioenerg Biomembr* 18, 331-368.

846 Heide, H., Bleier, L., Steger, M., Ackermann, J., Drose, S., Schwamb, B., Zornig, M.,  
847 Reichert, A.S., Koch, I., Wittig, I., et al. (2012). Complexome profiling identifies  
848 TMEM126B as a component of the mitochondrial complex I assembly complex. *Cell Metab*  
849 *16*, 538-549.

850 Holloszy, J.O. (1967). Biochemical adaptations in muscle. Effects of exercise on  
851 mitochondrial oxygen uptake and respiratory enzyme activity in skeletal muscle. *J Biol*  
852 *Chem* *242*, 2278-2282.

853 Holloszy, J.O., and Oscai, L.B. (1969). Effect of exercise on alpha-glycerophosphate  
854 dehydrogenase activity in skeletal muscle. *Arch Biochem Biophys* *130*, 653-656.

855 Holloszy, J.O., Oscai, L.B., Don, I.J., and Mole, P.A. (1970). Mitochondrial citric acid cycle  
856 and related enzymes: adaptive response to exercise. *Biochem Biophys Res Commun* *40*,  
857 1368-1373.

858 Jha, P., Wang, X., and Auwerx, J. (2016). Analysis of mitochondrial respiratory chain  
859 supercomplexes using Blue Native Polyacrylamide Gel Electrophoresis (BN-PAGE). *Curr*  
860 *Protoc Mouse Biol* *6*, 1-14.

861 Keckesova, Z., Donaher, J.L., De Cock, J., Freinkman, E., Lingrell, S., Bachovchin, D.A.,  
862 Bierie, B., Tischler, V., Noske, A., Okondo, M.C., et al. (2017). LACTB is a tumour  
863 suppressor that modulates lipid metabolism and cell state. *Nature* *543*, 681-686.

864 Kitazawa, S., Ebara, S., Ando, A., Baba, Y., Satomi, Y., Soga, T., and Hara, T. (2017).  
865 Succinate dehydrogenase B-deficient cancer cells are highly sensitive to bromodomain  
866 and extra-terminal inhibitors. *Oncotarget* *8*, 28922-28938.

867 Koopman, W.J., Verkaart, S., van Emst-de Vries, S.E., Grefte, S., Smeitink, J.A., and  
868 Willems, P.H. (2006). Simultaneous quantification of oxidative stress and cell spreading  
869 using 5-(and-6)-chloromethyl-2',7'-dichlorofluorescein. *Cytometry A* *69*, 1184-1192.

870 Koopman, W.J., Verkaart, S., Visch, H.J., van der Westhuizen, F.H., Murphy, M.P., van  
871 den Heuvel, L.W., Smeitink, J.A., and Willems, P.H. (2005). Inhibition of complex I of the  
872 electron transport chain causes O<sub>2</sub><sup>-</sup>-mediated mitochondrial outgrowth. *Am J Physiol Cell*  
873 *Physiol* *288*, C1440-1450.

874 Krahmer, N., Najafi, B., Schueder, F., Quagliarini, F., Steger, M., Seitz, S., Kasper, R.,  
875 Salinas, F., Cox, J., Uhlenhaut, N.H., et al. (2018). Organellar proteomics and phospho-  
876 proteomics reveal subcellular reorganization in diet-induced hepatic steatosis. *Dev Cell* *47*,  
877 205-221 e207.



- 878 Kuhl, I., Miranda, M., Atanassov, I., Kuznetsova, I., Hinze, Y., Mourier, A., Filipovska, A.,  
879 and Larsson, N.G. (2017). Transcriptomic and proteomic landscape of mitochondrial  
880 dysfunction reveals secondary coenzyme Q deficiency in mammals. *Elife* 6.
- 881 Kulawiak, B., Hopker, J., Gebert, M., Guiard, B., Wiedemann, N., and Gebert, N. (2013).  
882 The mitochondrial protein import machinery has multiple connections to the respiratory  
883 chain. *Biochim Biophys Acta* 1827, 612-626.
- 884 Lapuente-Brun, E., Moreno-Loshuertos, R., Acin-Perez, R., Latorre-Pellicer, A., Colas, C.,  
885 Balsa, E., Perales-Clemente, E., Quiros, P.M., Calvo, E., Rodriguez-Hernandez, M.A., et  
886 al. (2013). Supercomplex assembly determines electron flux in the mitochondrial electron  
887 transport chain. *Science* 340, 1567-1570.
- 888 Lau, W., Andrew, T., and Maniatis, N. (2017). High-resolution genetic maps identify  
889 multiple type 2 diabetes loci at regulatory hotspots in african americans and europeans.  
890 *Am J Hum Genet* 100, 803-816.
- 891 Lee, D.E., Brown, J.L., Rosa, M.E., Brown, L.A., Perry, R.A., Washington, T.A., and  
892 Greene, N.P. (2016). Translational machinery of mitochondrial mRNA is promoted by  
893 physical activity in Western diet-induced obese mice. *Acta Physiol (Oxf)* 218, 167-177.
- 894 Lenaz, G., and Genova, M.L. (2007). Kinetics of integrated electron transfer in the  
895 mitochondrial respiratory chain: random collisions vs. solid state electron channeling. *Am J*  
896 *Physiol Cell Physiol* 292, C1221-1239.
- 897 Liu, F., Lossl, P., Rabbitts, B.M., Balaban, R.S., and Heck, A.J.R. (2018). The interactome  
898 of intact mitochondria by cross-linking mass spectrometry provides evidence for coexisting  
899 respiratory supercomplexes. *Mol Cell Proteomics* 17, 216-232.
- 900 Lombardi, A., Silvestri, E., Cioffi, F., Senese, R., Lanni, A., Goglia, F., de Lange, P., and  
901 Moreno, M. (2009). Defining the transcriptomic and proteomic profiles of rat ageing  
902 skeletal muscle by the use of a cDNA array, 2D- and Blue native-PAGE approach. *J*  
903 *Proteomics* 72, 708-721.
- 904 Marbois, B., Gin, P., Gulmezian, M., and Clarke, C.F. (2009). The yeast Coq4 polypeptide  
905 organizes a mitochondrial protein complex essential for coenzyme Q biosynthesis.  
906 *Biochim Biophys Acta* 1791, 69-75.
- 907 Menshikova, E.V., Ritov, V.B., Fairfull, L., Ferrell, R.E., Kelley, D.E., and Goodpaster, B.H.  
908 (2006). Effects of exercise on mitochondrial content and function in aging human skeletal  
909 muscle. *J Gerontol A Biol Sci Med Sci* 61, 534-540.

910 Mole, P.A., Oscai, L.B., and Holloszy, J.O. (1971). Adaptation of muscle to exercise.  
911 Increase in levels of palmityl Coa synthetase, carnitine palmityltransferase, and palmityl  
912 Coa dehydrogenase, and in the capacity to oxidize fatty acids. *J Clin Invest* 50, 2323-  
913 2330.

914 Moreno-Lastres, D., Fontanesi, F., Garcia-Consuegra, I., Martin, M.A., Arenas, J.,  
915 Barrientos, A., and Ugalde, C. (2012). Mitochondrial complex I plays an essential role in  
916 human respirasome assembly. *Cell Metab* 15, 324-335.

917 Perez-Riverol, Y., Csordas, A., Bai, J., Bernal-Llinares, M., Hewapathirana, S., Kundu,  
918 D.J., Inuganti, A., Griss, J., Mayer, G., Eisenacher, M., et al. (2019). The PRIDE database  
919 and related tools and resources in 2019: improving support for quantification data. *Nucleic*  
920 *Acids Res* 47, D442-D450.

921 Polianskyte, Z., Peitsaro, N., Dapkunas, A., Liobikas, J., Soliymani, R., Lalowski, M.,  
922 Speer, O., Seitsonen, J., Butcher, S., Cereghetti, G.M., et al. (2009). LACTB is a filament-  
923 forming protein localized in mitochondria. *Proc Natl Acad Sci U S A* 106, 18960-18965.

924 Puntschart, A., Claassen, H., Jostarndt, K., Hoppeler, H., and Billeter, R. (1995). mRNAs  
925 of enzymes involved in energy metabolism and mtDNA are increased in endurance-trained  
926 athletes. *Am J Physiol* 269, C619-625.

927 Quiles, J.L., Huertas, J.R., Manas, M., Battino, M., Cassinello, M., Littarru, G.P., Lenaz,  
928 G., and Mataix, F.J. (1994). Peroxidative extent and coenzyme Q levels in the rat:  
929 influence of physical training and dietary fats. *Mol Aspects Med* 15 *Suppl*, s89-95.

930 Quinzii, C.M., and Hirano, M. (2010). Coenzyme Q and mitochondrial disease. *Dev Disabil*  
931 *Res Rev* 16, 183-188.

932 Rappsilber, J., Ishihama, Y., and Mann, M. (2003). Stop and go extraction tips for matrix-  
933 assisted laser desorption/ionization, nanoelectrospray, and LC/MS sample pretreatment in  
934 proteomics. *Anal Chem* 75, 663-670.

935 Rappsilber, J., Mann, M., and Ishihama, Y. (2007). Protocol for micro-purification,  
936 enrichment, pre-fractionation and storage of peptides for proteomics using StageTips. *Nat*  
937 *Protoc* 2, 1896-1906.

938 Richman, T.R., Spahr, H., Ermer, J.A., Davies, S.M., Viola, H.M., Bates, K.A.,  
939 Papadimitriou, J., Hool, L.C., Rodger, J., Larsson, N.G., et al. (2016). Loss of the RNA-  
940 binding protein TACO1 causes late-onset mitochondrial dysfunction in mice. *Nat Commun*  
941 7, 11884.

942 Robinson, M.M., Dasari, S., Konopka, A.R., Johnson, M.L., Manjunatha, S., Esponda,  
943 R.R., Carter, R.E., Lanza, I.R., and Nair, K.S. (2017). Enhanced protein translation  
944 underlies improved metabolic and physical adaptations to different exercise training modes  
945 in young and old humans. *Cell Metab* 25, 581-592.

946 Rotig, A., Appelkvist, E.L., Geromel, V., Chretien, D., Kadhon, N., Edery, P., Lebideau,  
947 M., Dallner, G., Munnich, A., Ernster, L., et al. (2000). Quinone-responsive multiple  
948 respiratory-chain dysfunction due to widespread coenzyme Q10 deficiency. *Lancet* 356,  
949 391-395.

950 Rutter, J., Winge, D.R., and Schiffman, J.D. (2010). Succinate dehydrogenase - Assembly,  
951 regulation and role in human disease. *Mitochondrion* 10, 393-401.

952 Sae-Tan, S., Rogers, C.J., and Lambert, J.D. (2014). Voluntary exercise and green tea  
953 enhance the expression of genes related to energy utilization and attenuate metabolic  
954 syndrome in high fat fed mice. *Mol Nutr Food Res* 58, 1156-1159.

955 Schagger, H., and Pfeiffer, K. (2000). Supercomplexes in the respiratory chains of yeast  
956 and mammalian mitochondria. *EMBO J* 19, 1777-1783.

957 Schonke, M., Bjornholm, M., Chibalin, A.V., Zierath, J.R., and Deshmukh, A.S. (2018).  
958 Proteomics analysis of skeletal muscle from leptin-deficient ob/ob mice reveals adaptive  
959 remodeling of metabolic characteristics and fiber type composition. *Proteomics* 18,  
960 e1700375.

961 Shevchenko, A., Tomas, H., Havlis, J., Olsen, J.V., and Mann, M. (2006). In-gel digestion  
962 for mass spectrometric characterization of proteins and proteomes. *Nat Protoc* 1, 2856-  
963 2860.

964 Sun, G., Kinter, M.T., and Anderson, V.E. (2003). Mass spectrometric characterization of  
965 mitochondrial electron transport complexes: subunits of the rat heart ubiquinol-cytochrome  
966 c reductase. *J Mass Spectrom* 38, 531-539.

967 Szklarczyk, D., Franceschini, A., Wyder, S., Forslund, K., Heller, D., Huerta-Cepas, J.,  
968 Simonovic, M., Roth, A., Santos, A., Tsafou, K.P., et al. (2015). STRING v10: protein-  
969 protein interaction networks, integrated over the tree of life. *Nucleic Acids Res* 43, D447-  
970 452.

971 Tyanova, S., Temu, T., and Cox, J. (2016). The MaxQuant computational platform for  
972 mass spectrometry-based shotgun proteomics. *Nat Protoc* 11, 2301-2319.

- 973 Ubaida-Mohien, C., Gonzalez-Freire, M., Lyashkov, A., Moaddel, R., Chia, C.W.,  
974 Simonsick, E.M., Sen, R., and Ferrucci, L. (2019). Physical activity associated proteomics  
975 of skeletal muscle: Being physically active in daily life may protect skeletal muscle from  
976 aging. *Front Physiol* 10, 312.
- 977 Ugalde, C., Janssen, R.J., van den Heuvel, L.P., Smeitink, J.A., and Nijtmans, L.G. (2004).  
978 Differences in assembly or stability of complex I and other mitochondrial OXPHOS  
979 complexes in inherited complex I deficiency. *Hum Mol Genet* 13, 659-667.
- 980 Van Strien, J., Guerrero-Castillo, S., Chatzisprou, I.A., Houtkooper, R.H., Brandt, U., and  
981 Huynen, M.A. (2019). COmplexome Profiling ALignment (COPAL) reveals remodeling of  
982 mitochondrial protein complexes in Barth syndrome. *Bioinformatics* 35, 3083-3091.
- 983 Vogel, R.O., Janssen, R.J., van den Brand, M.A., Dieteren, C.E., Verkaart, S., Koopman,  
984 W.J., Willems, P.H., Pluk, W., van den Heuvel, L.P., Smeitink, J.A., et al. (2007). Cytosolic  
985 signaling protein Ecsit also localizes to mitochondria where it interacts with chaperone  
986 NDUFAF1 and functions in complex I assembly. *Genes Dev* 21, 615-624.
- 987 Weraarpachai, W., Antonicka, H., Sasarman, F., Seeger, J., Schrank, B., Kolesar, J.E.,  
988 Lochmuller, H., Chevrette, M., Kaufman, B.A., Horvath, R., et al. (2009). Mutation in  
989 TACO1, encoding a translational activator of COX I, results in cytochrome c oxidase  
990 deficiency and late-onset Leigh syndrome. *Nat Genet* 41, 833-837.
- 991 Wessels, H.J., Vogel, R.O., van den Heuvel, L., Smeitink, J.A., Rodenburg, R.J., Nijtmans,  
992 L.G., and Farhoud, M.H. (2009). LC-MS/MS as an alternative for SDS-PAGE in blue native  
993 analysis of protein complexes. *Proteomics* 9, 4221-4228.
- 994 Wisniewski, J.R. (2017). Label-Free and Standard-Free Absolute Quantitative Proteomics  
995 Using the "Total Protein" and "Proteomic Ruler" Approaches. *Methods Enzymol* 585, 49-  
996 60.
- 997 Wisniewski, J.R., Hein, M.Y., Cox, J., and Mann, M. (2014). A "proteomic ruler" for protein  
998 copy number and concentration estimation without spike-in standards. *Mol Cell Proteomics*  
999 13, 3497-3506.
- 1000 Wisniewski, J.R., and Mann, M. (2012). Consecutive proteolytic digestion in an enzyme  
1001 reactor increases depth of proteomic and phosphoproteomic analysis. *Anal Chem* 84,  
1002 2631-2637.
- 1003 Xiao, Y., Hsiao, T.H., Suresh, U., Chen, H.I., Wu, X., Wolf, S.E., and Chen, Y. (2014). A  
1004 novel significance score for gene selection and ranking. *Bioinformatics* 30, 801-807.

1005 Xu, J., Seo, A.Y., Vorobyeva, D.A., Carter, C.S., Anton, S.D., Lezza, A.M., and  
1006 Leeuwenburgh, C. (2010). Beneficial effects of a Q-ter based nutritional mixture on  
1007 functional performance, mitochondrial function, and oxidative stress in rats. *PLoS One* 5,  
1008 e10572.

1009 Yang, X., Deignan, J.L., Qi, H., Zhu, J., Qian, S., Zhong, J., Torosyan, G., Majid, S.,  
1010 Falkard, B., Kleinhanz, R.R., et al. (2009). Validation of candidate causal genes for obesity  
1011 that affect shared metabolic pathways and networks. *Nat Genet* 41, 415-423.

1012 Ylikoski, T., Piirainen, J., Hanninen, O., and Penttinen, J. (1997). The effect of coenzyme  
1013 Q10 on the exercise performance of cross-country skiers. *Mol Aspects Med* 18 *Suppl*,  
1014 S283-290.

1015 Yokokawa, T., Kido, K., Suga, T., Isaka, T., Hayashi, T., and Fujita, S. (2018). Exercise-  
1016 induced mitochondrial biogenesis coincides with the expression of mitochondrial  
1017 translation factors in murine skeletal muscle. *Physiol Rep* 6, e13893.

1018  
1019  
1020

Figure 1.

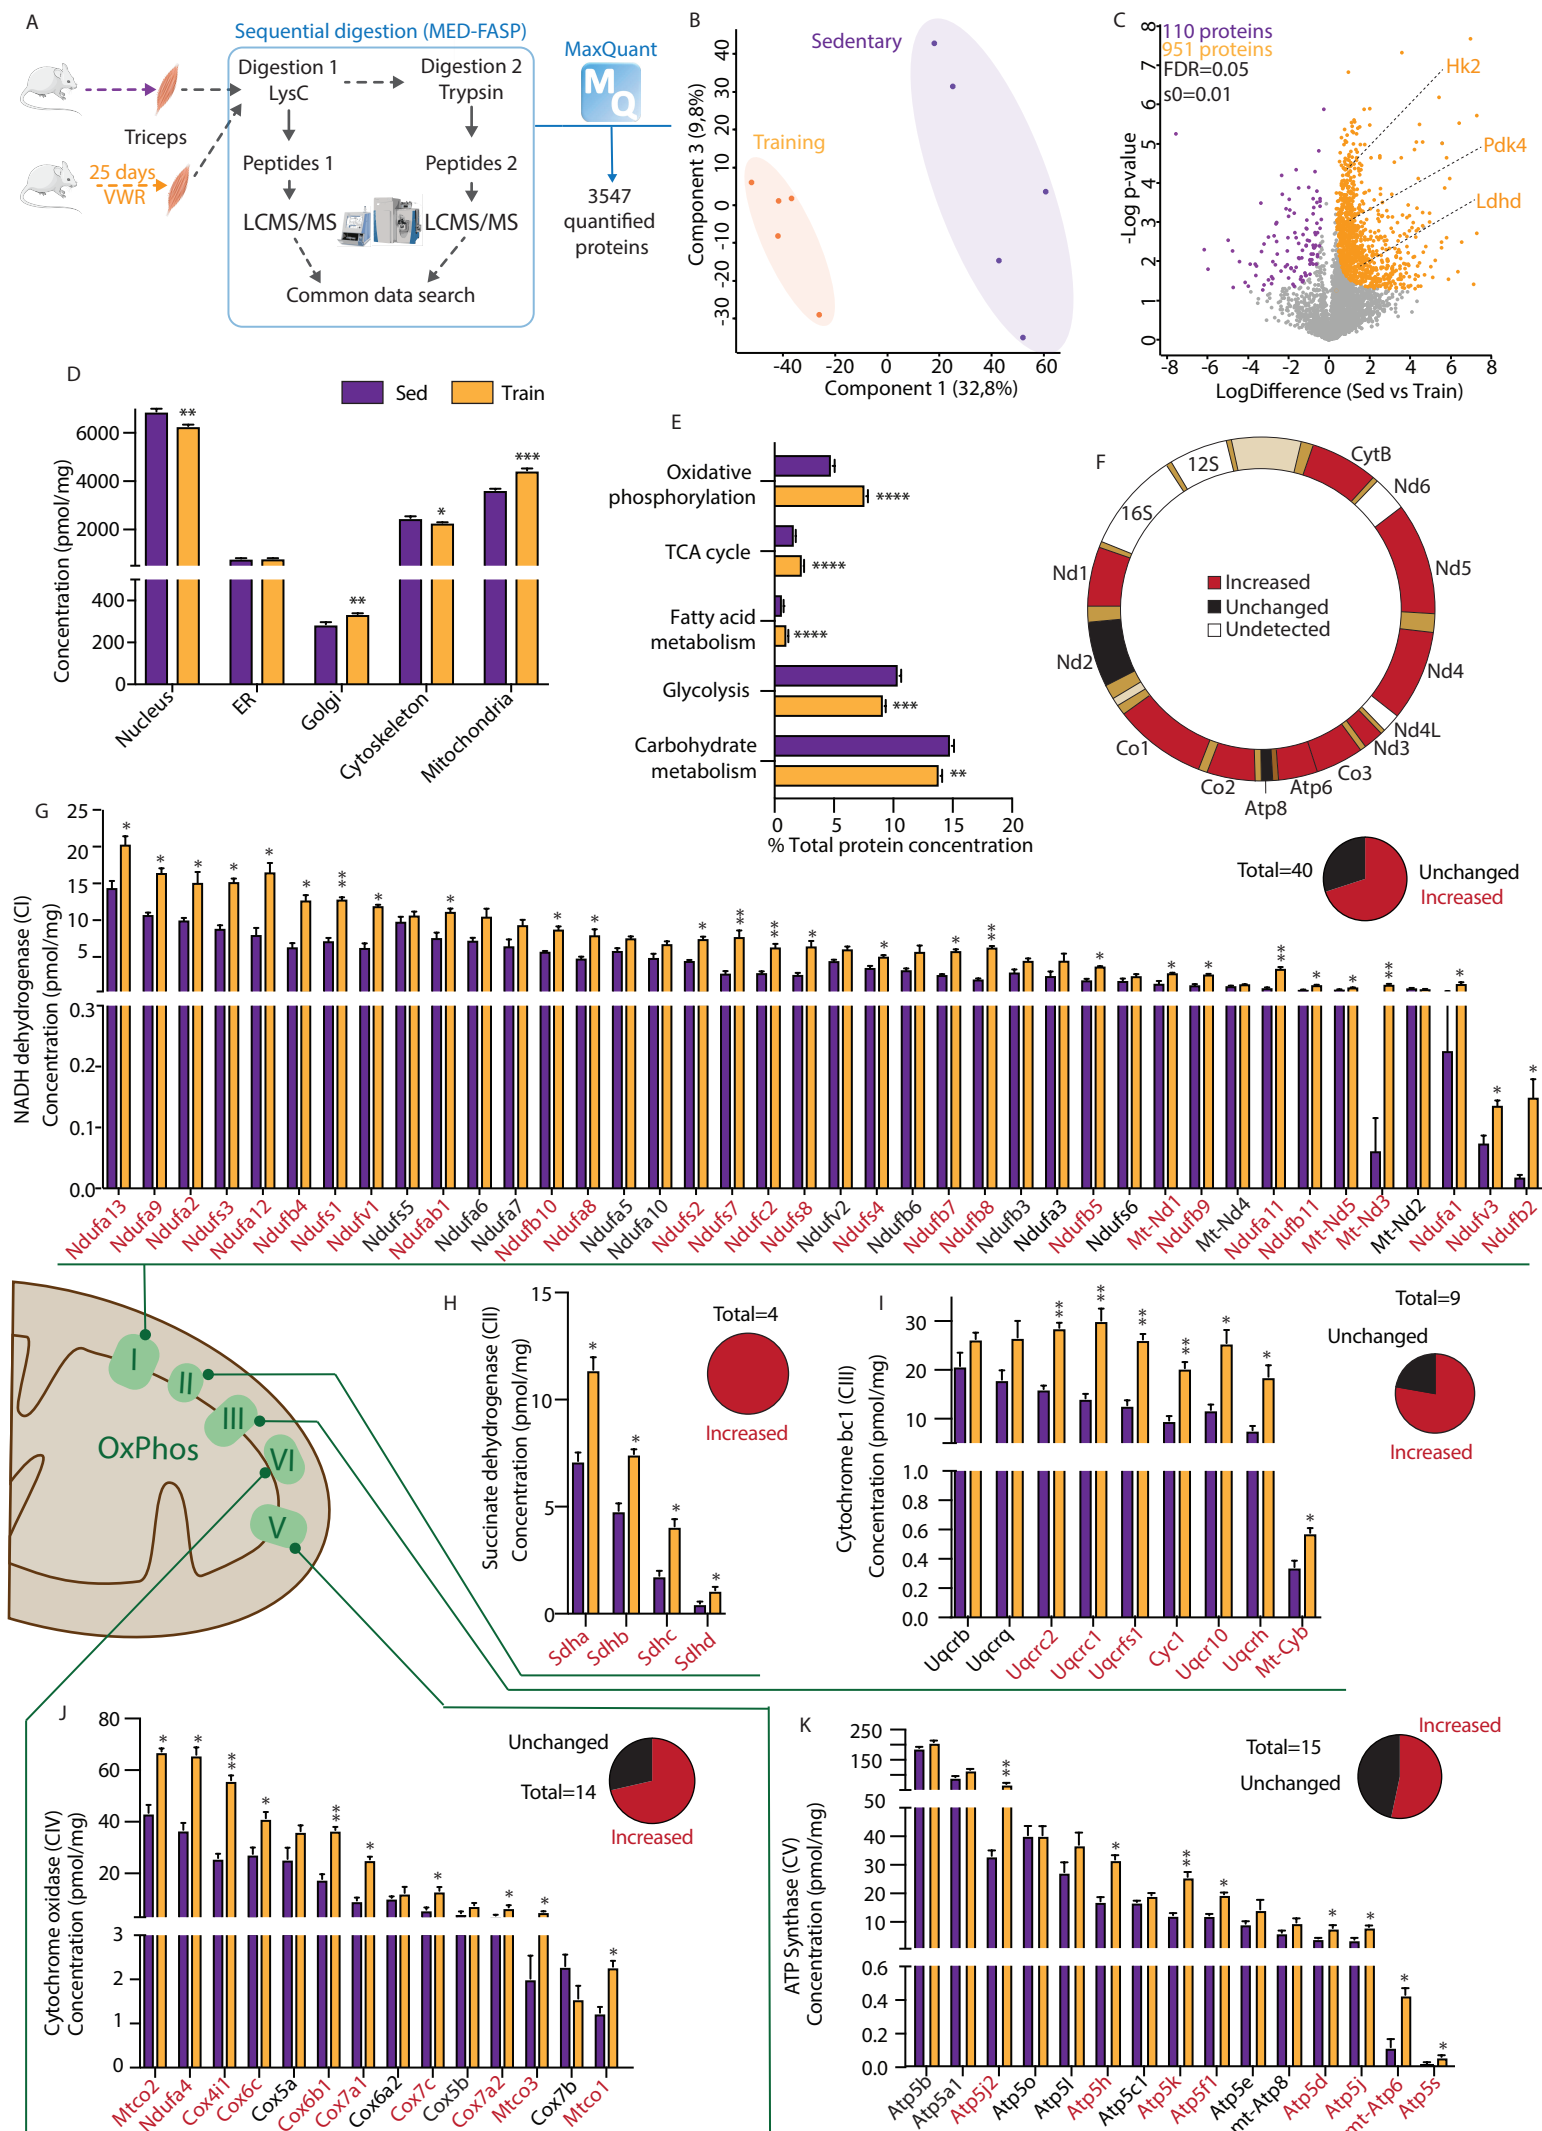

Figure 2.

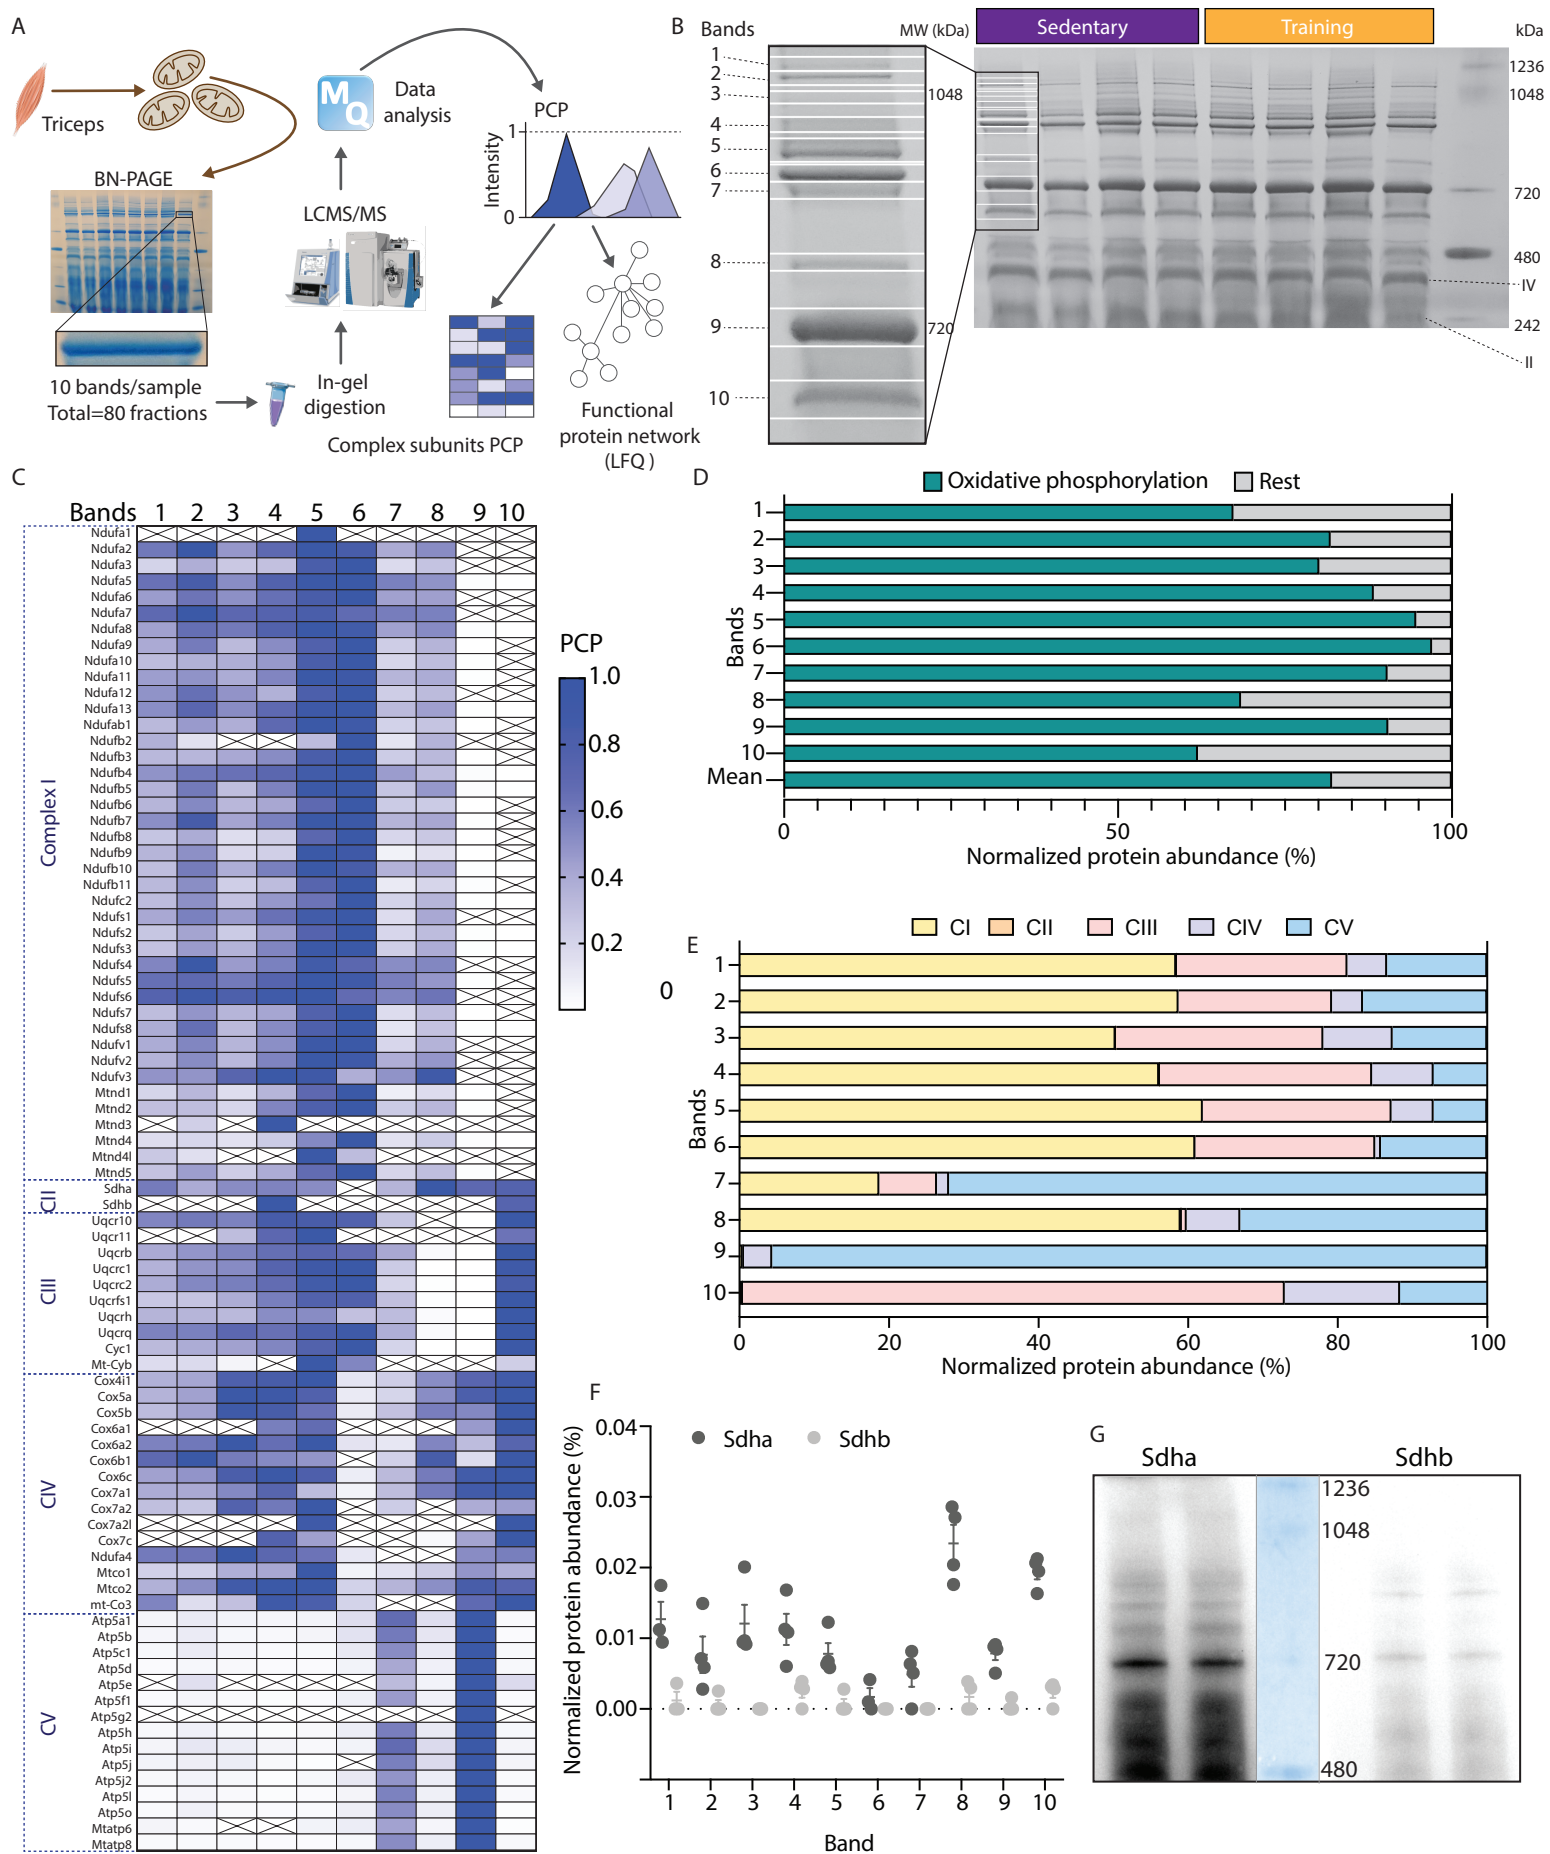

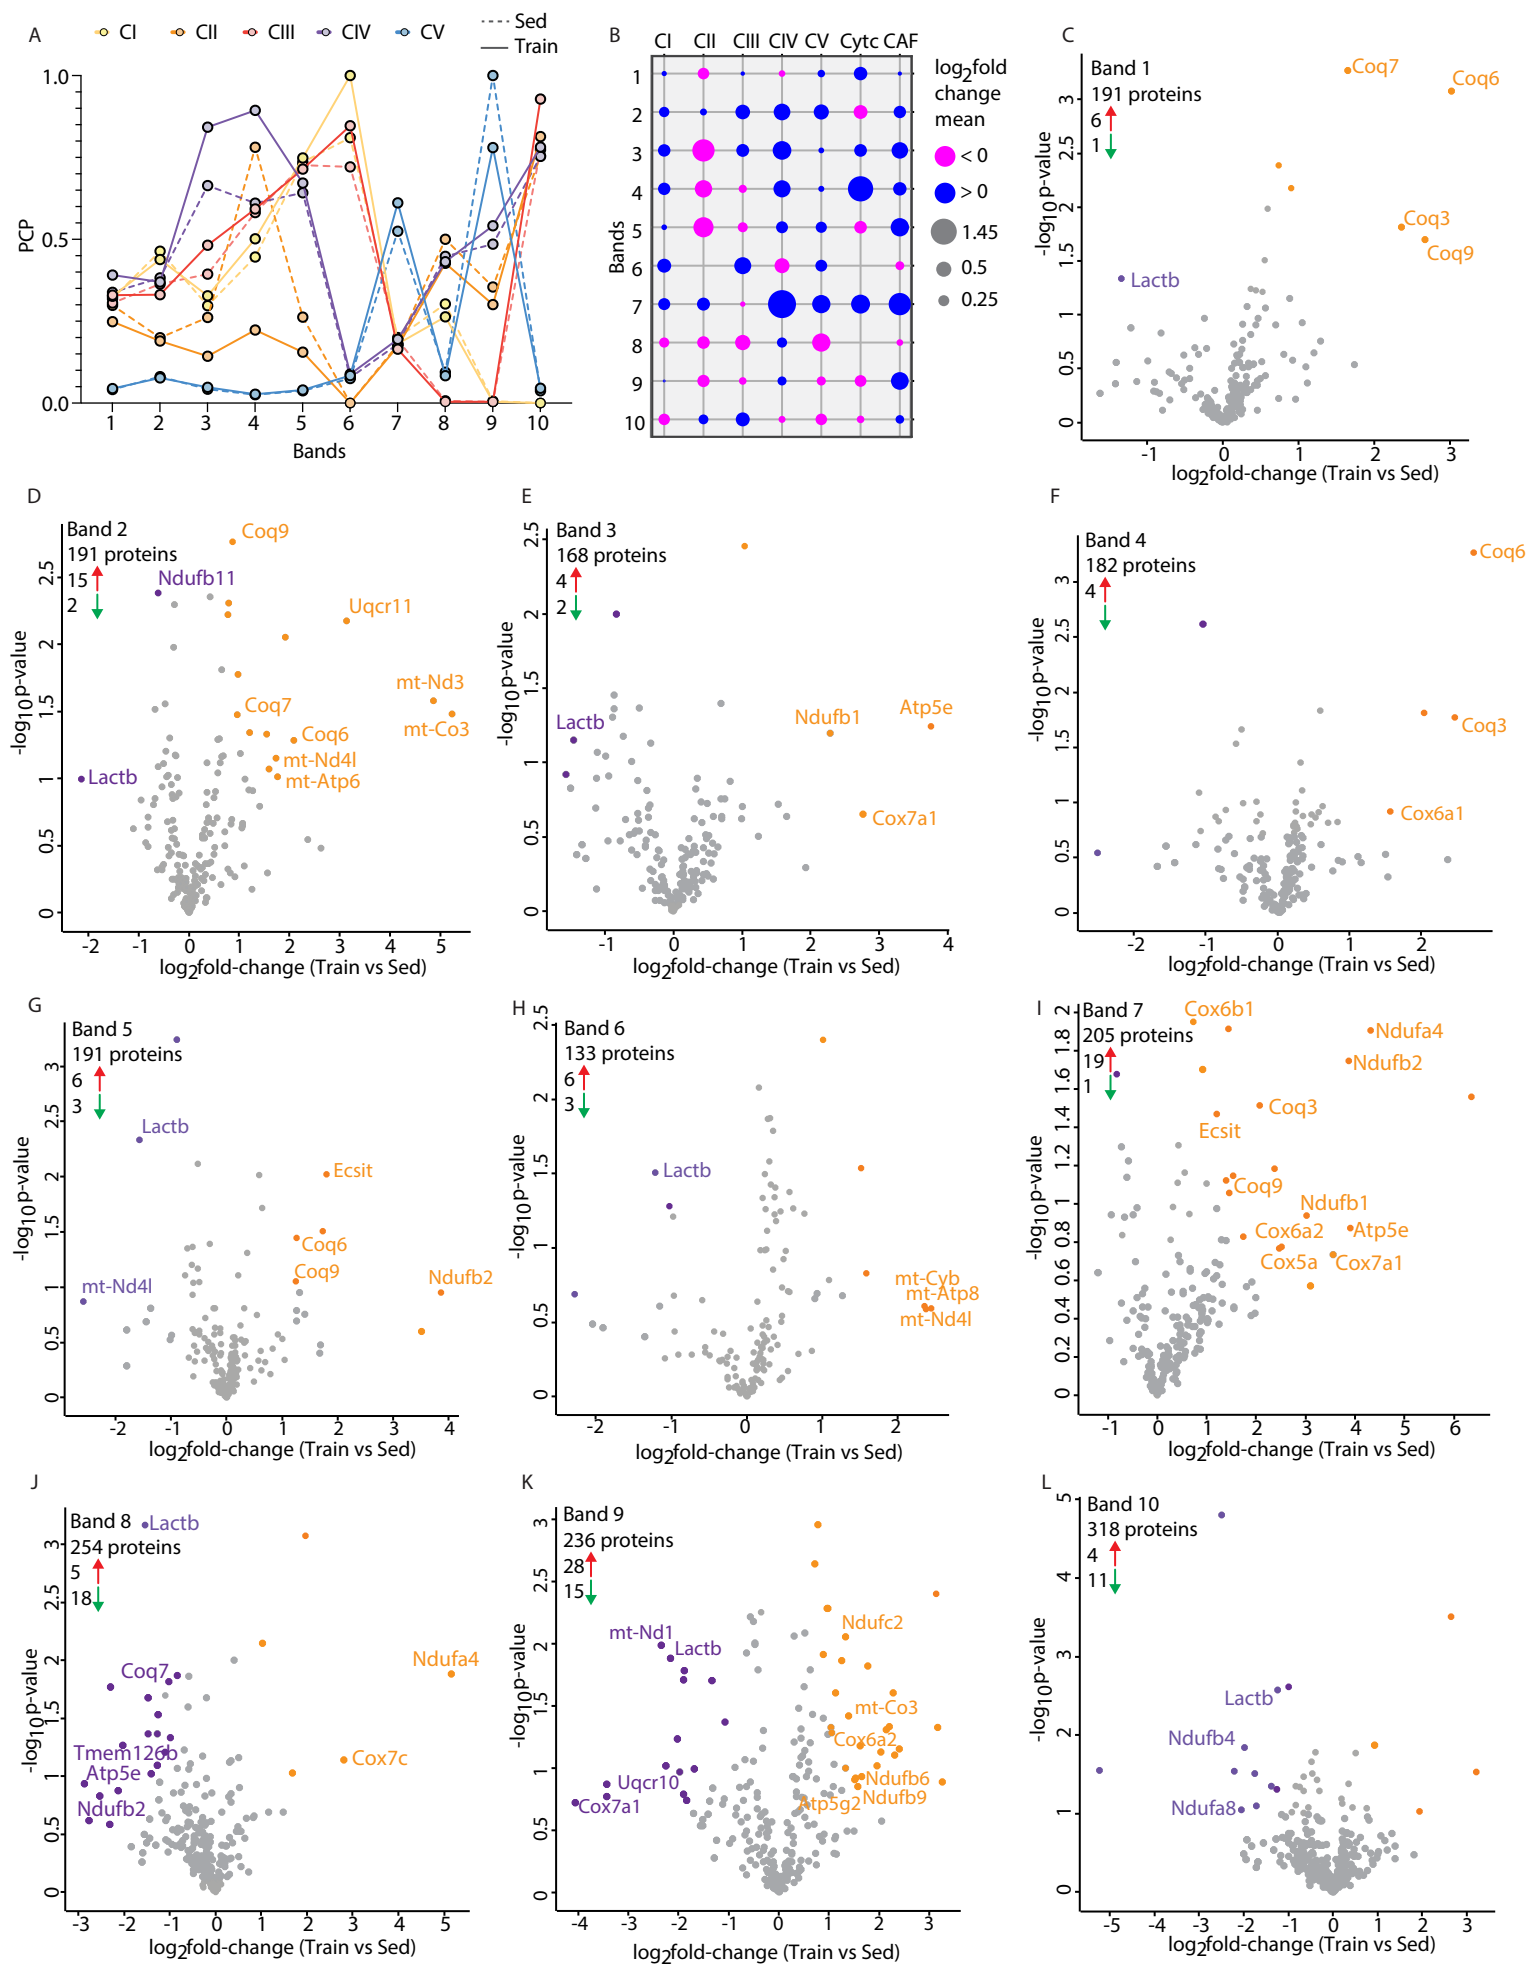



A

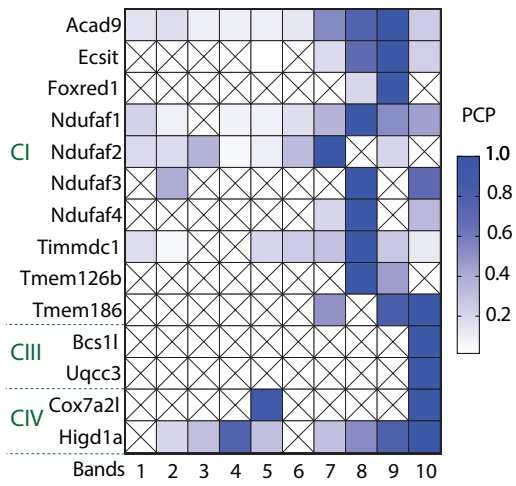

C

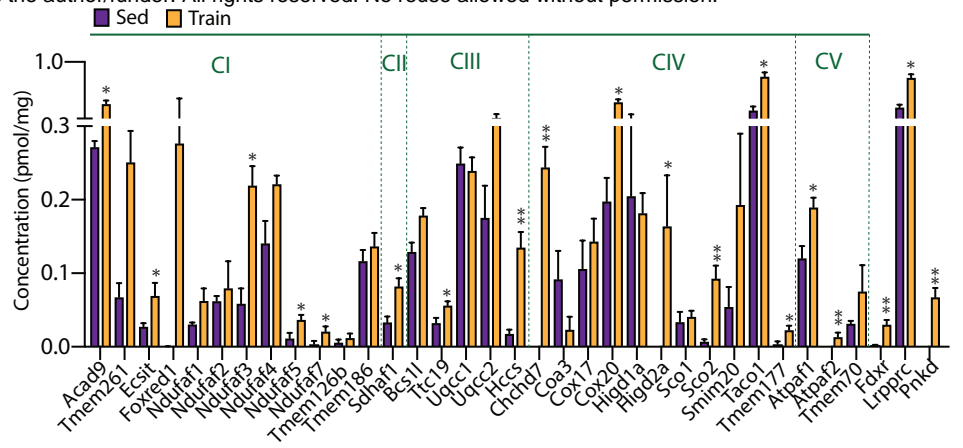

B

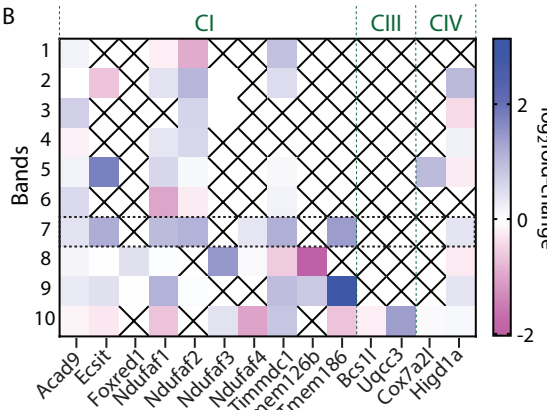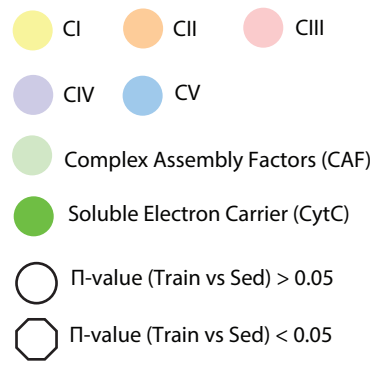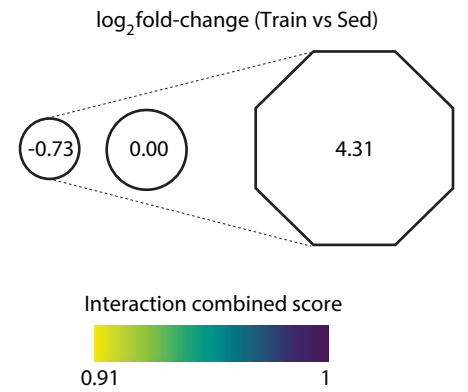

D Band 7

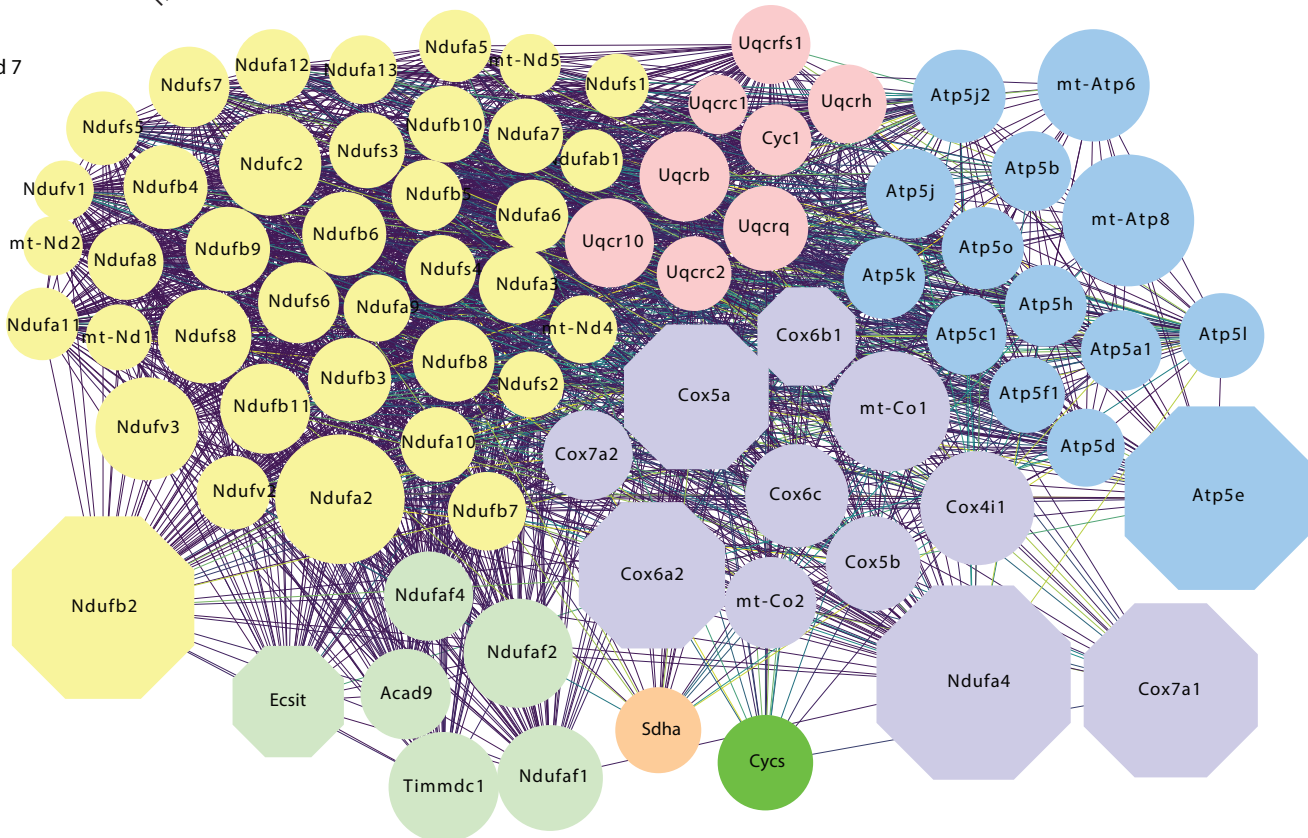

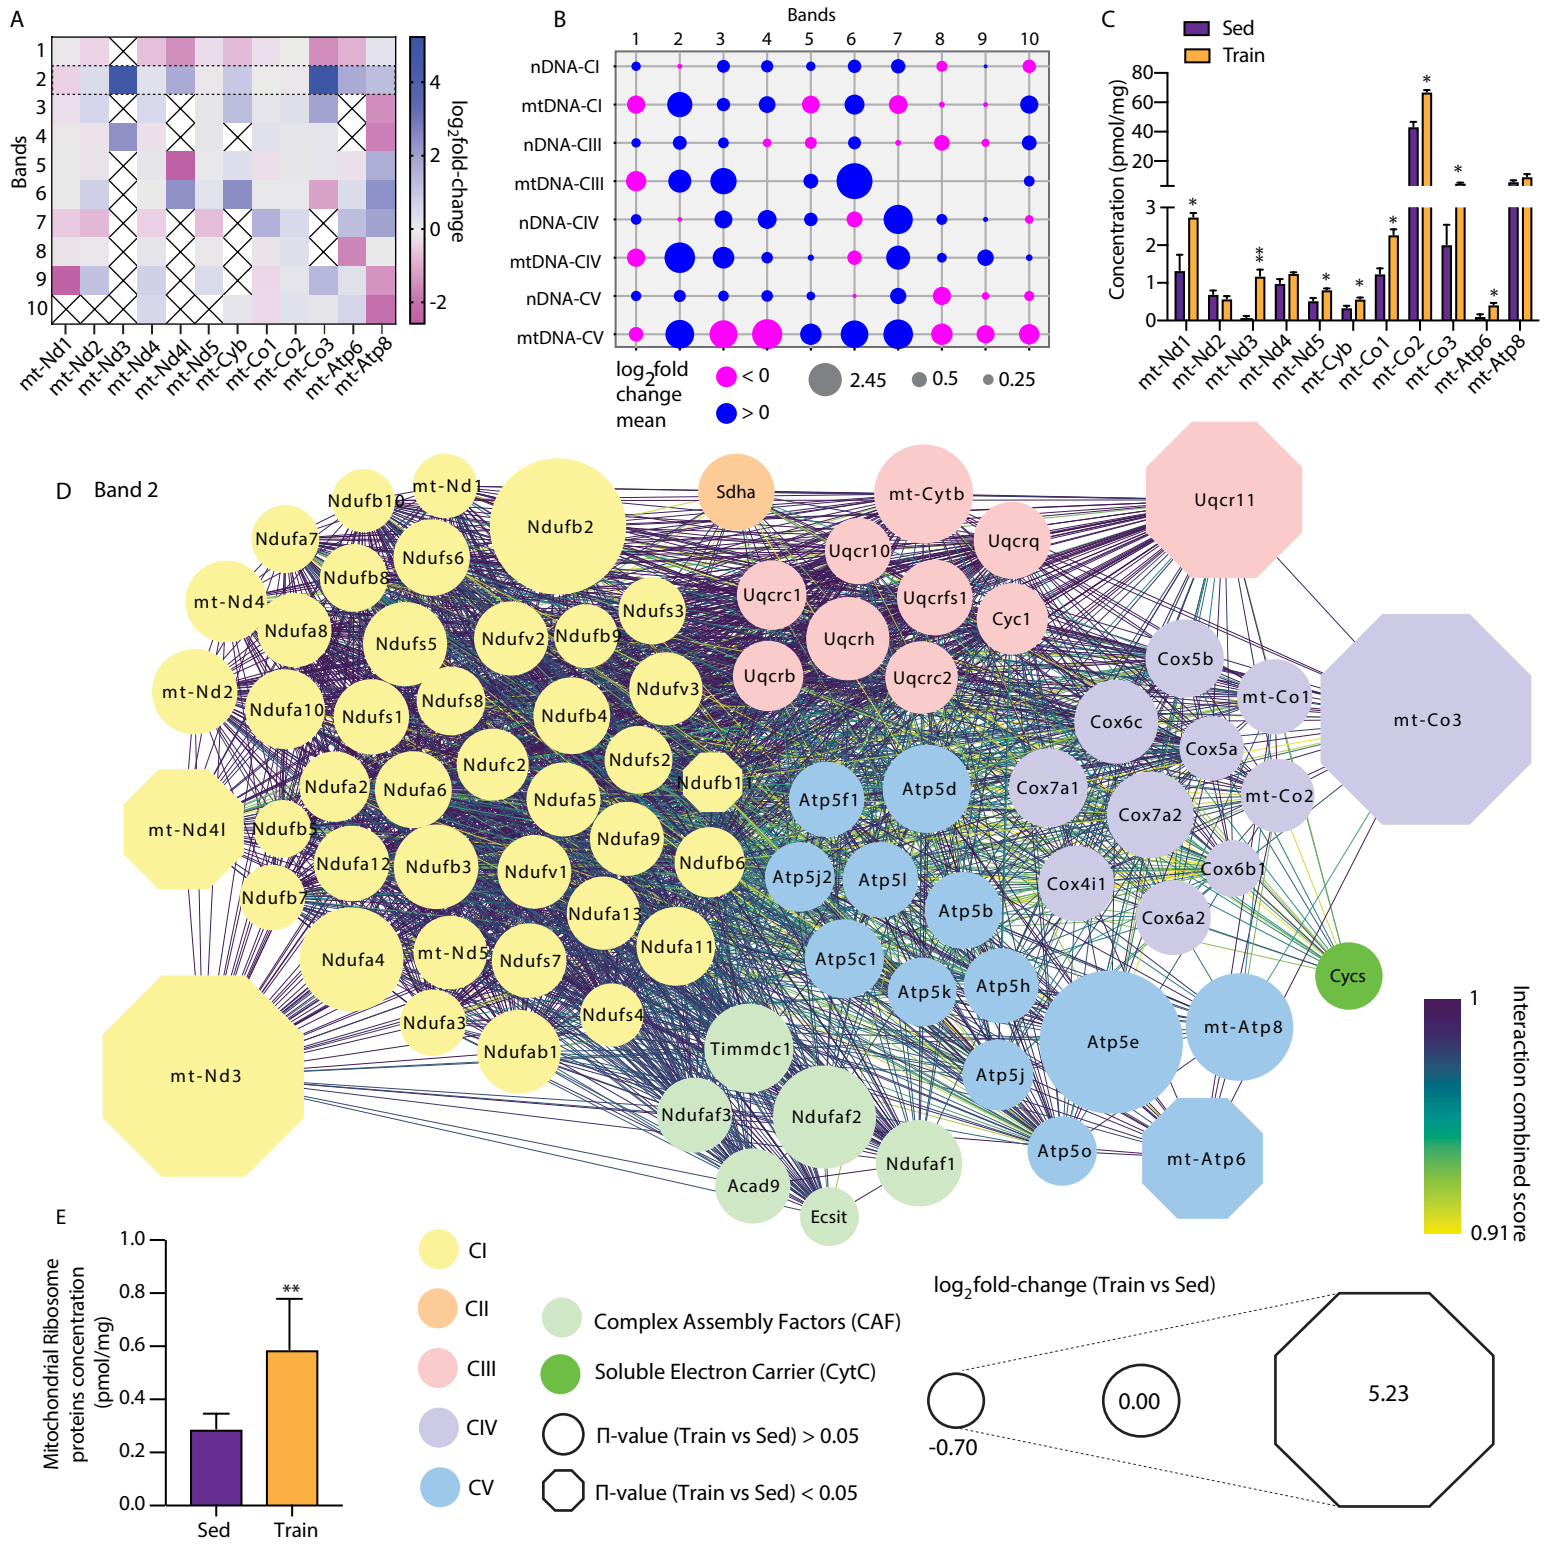

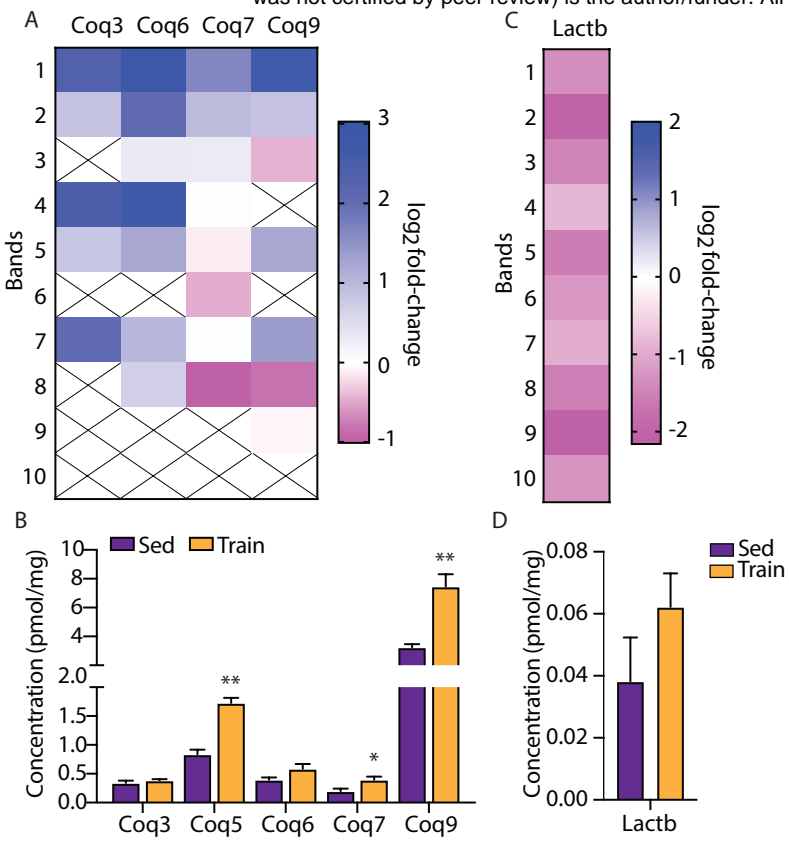

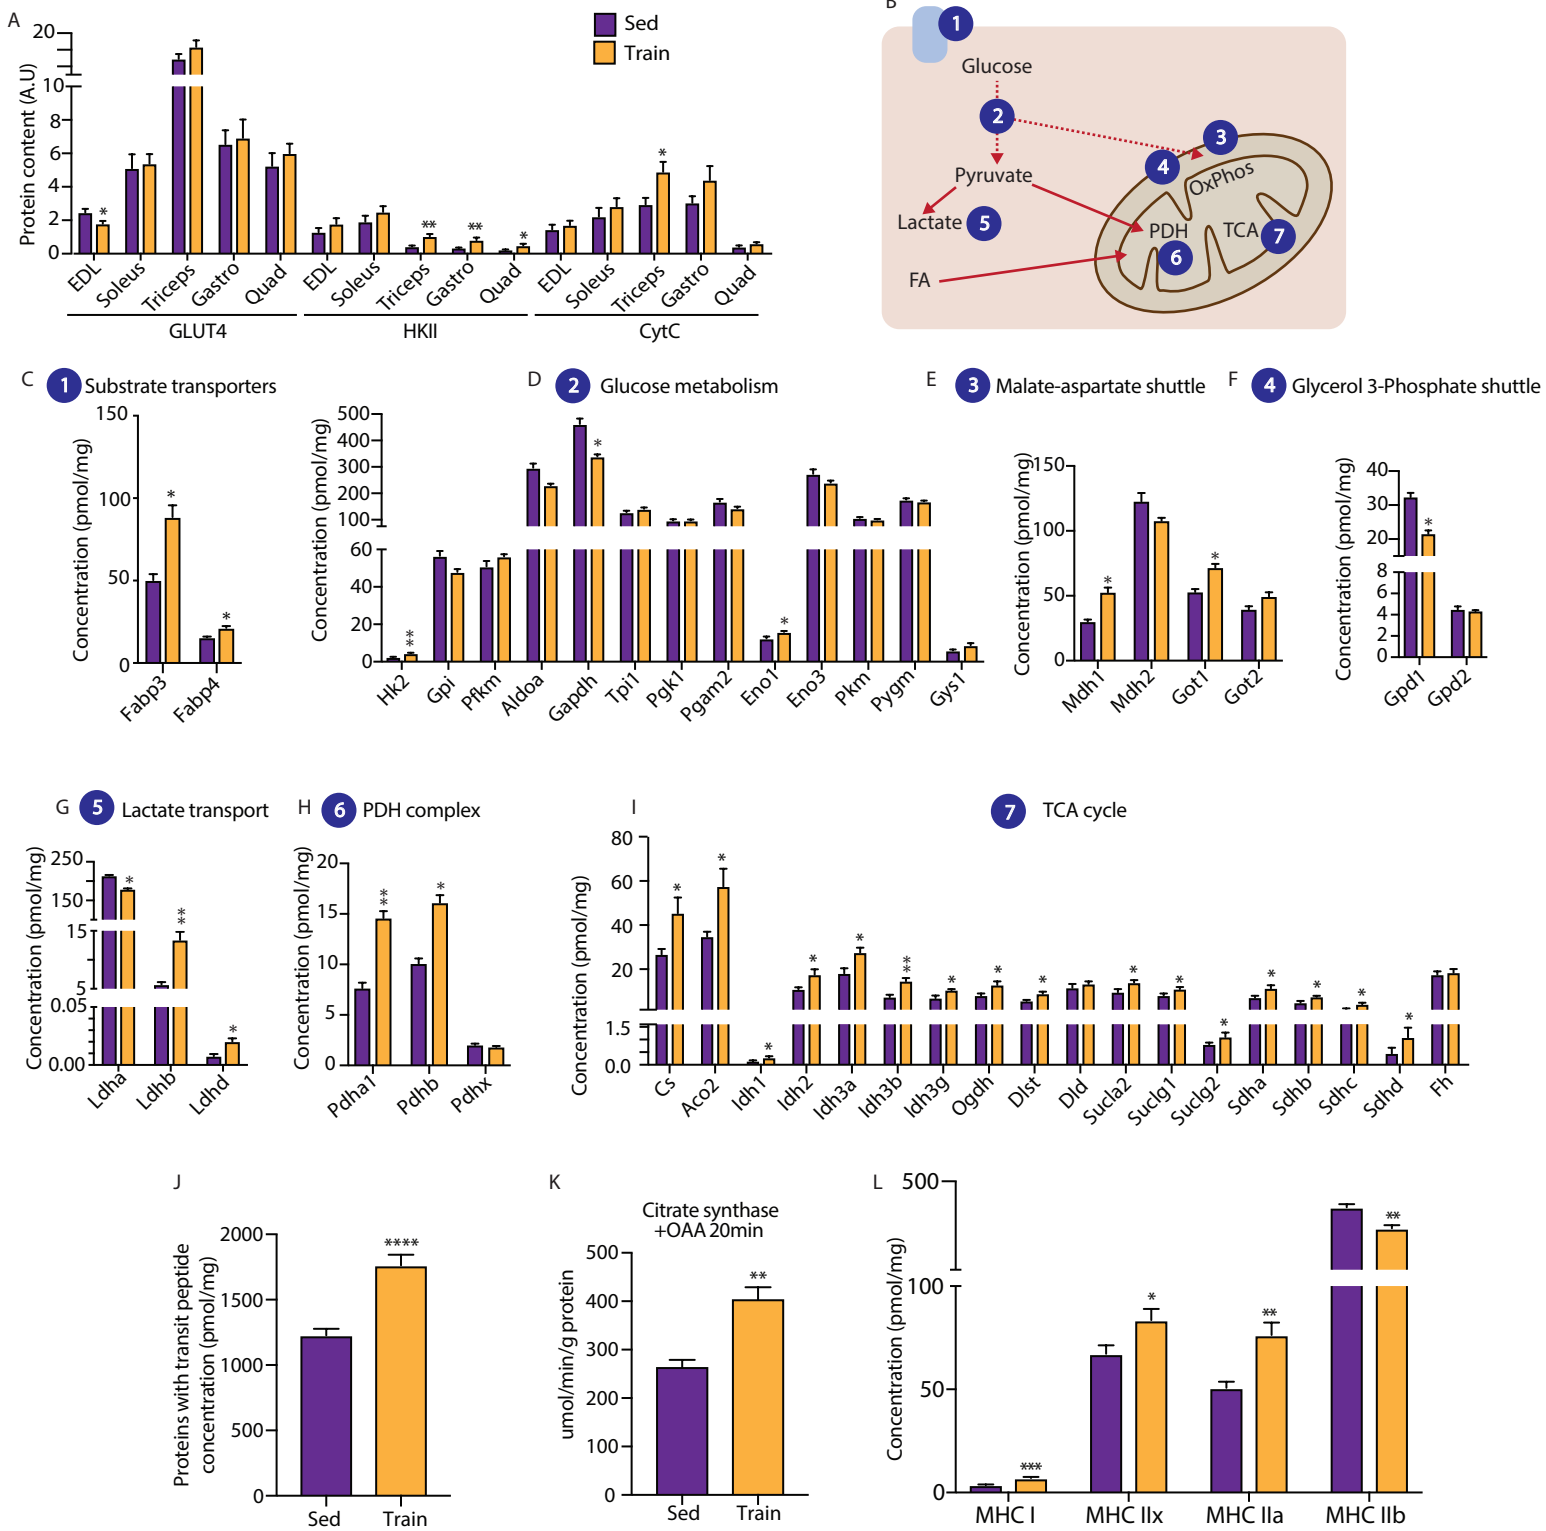

Source: https://www.biorxiv.org/content/10.1101/860080v1.full.pdf
